# Supplementary material
Source: PubMed Central journal article supplement (PMC2934784)
Supplement: NIHMS228433-supplement-2_si_002.pdf [file NIHMS228433-supplement-2_si_002.pdf]

Synthesis of Ruthenium Boryl Analogues of the Shvo Metal–Ligand Bifunctional  
Hydrogenation Catalyst

**Liza Koren-Selfridge, Ian P. Query, Joel A. Hanson, Nicholas A. Isley, Ilia A. Guzei,  
Timothy B. Clark\***

*Department of Chemistry, Western Washington University,  
Bellingham, Washington 99225*

*and*

*Department of Chemistry, University of Wisconsin-Madison,  
Madison, Wisconsin 53706*

**Supporting Information**

**Contents:**

|     |                                              |      |
|-----|----------------------------------------------|------|
| I.  | NMR Spectra of Complex <b>5</b> .....        | S-2  |
| II. | X-ray Crystal Data of Complex <b>5</b> ..... | S-12 |

I. NMR Spectra of Complexes 2, 3, 5, 7, 8

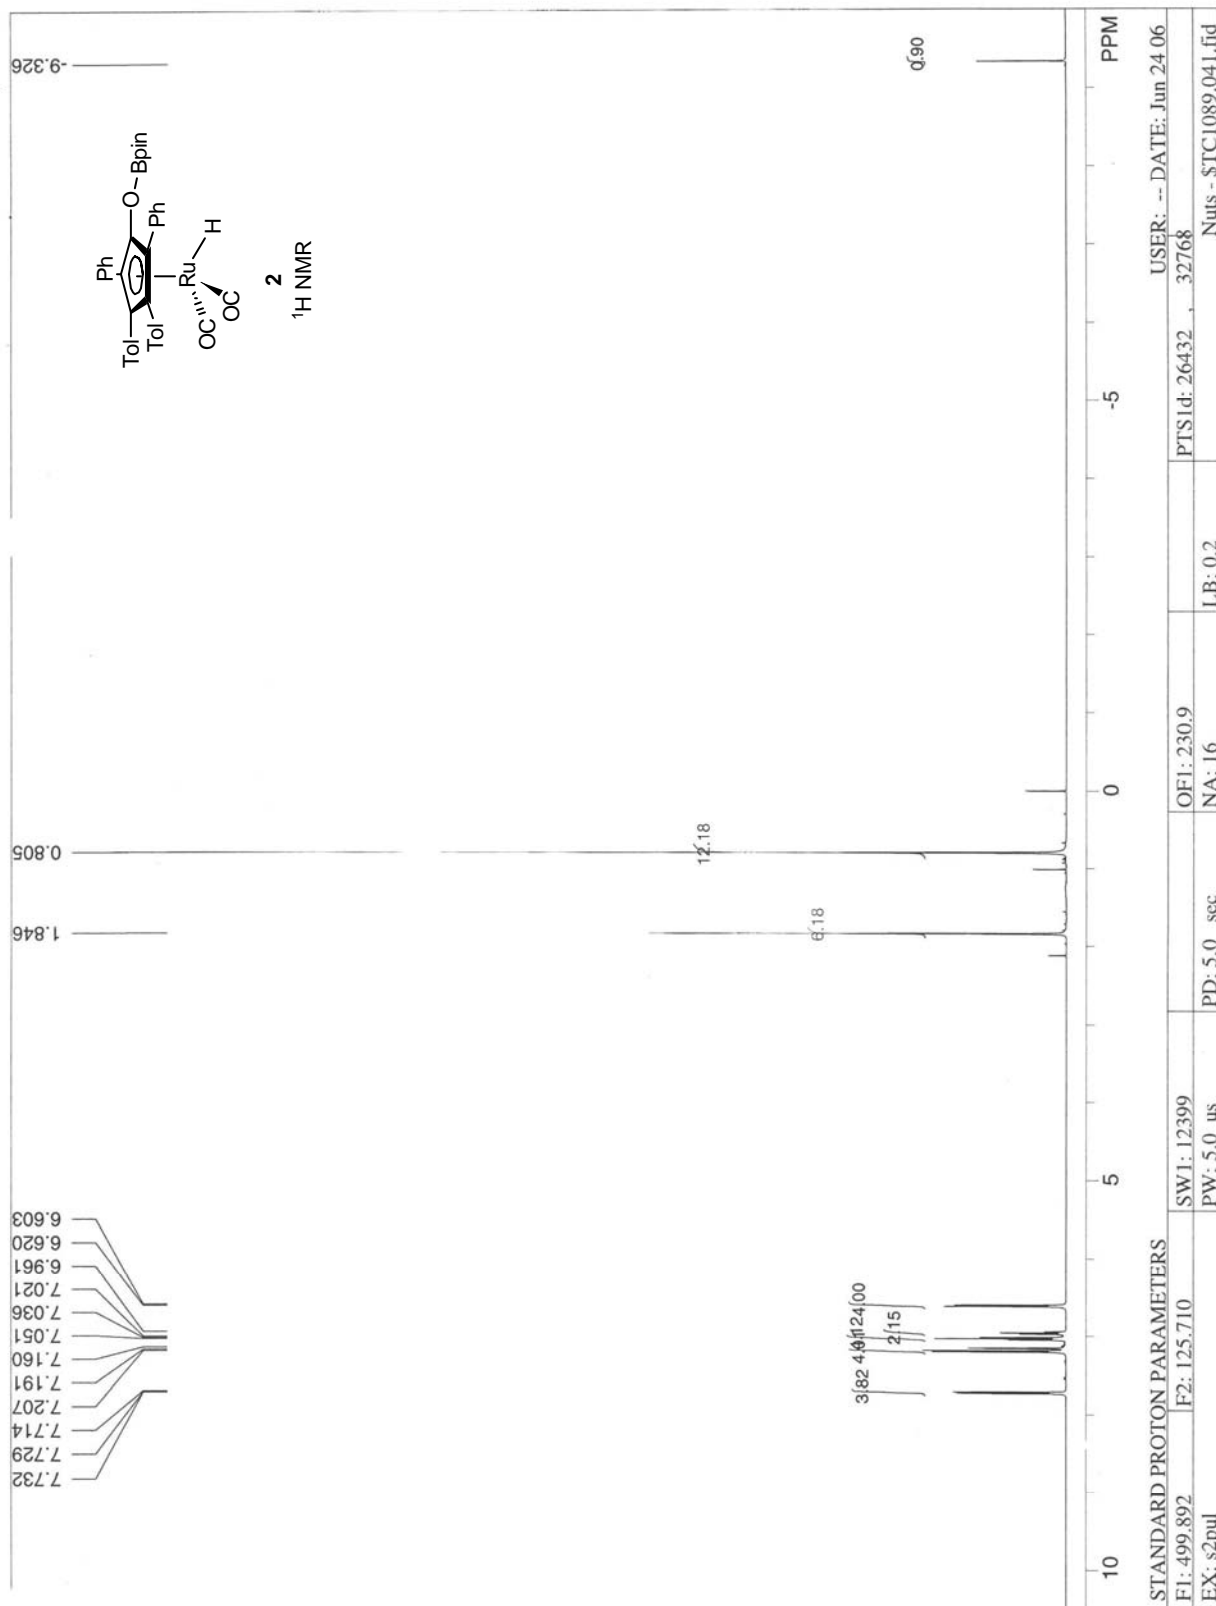

## STANDARD PROTON PARAMETERS

Sample Name:  
 Archive directory:  
 Sample directory:  
 FIDFile: TC1089.043  
 Pulse Sequence: s2pul  
 Solvent: Benzene  
 Data collected on: Jun 24 06

Temp. 24.0 C / 297.1 K  
 INOVA-500 "inovaNMR"

Pulse 32.1 degrees  
 Acq. time 0.500 sec  
 Width 32000.0 Hz  
 1024 repetitions  
 OBSERVE E11, 160.3851871 MHz  
 DECOUPLE H1, 499.8944164 MHz  
 Power 42 dB  
 continuously on  
 WALTZ-16 modulated  
 DATA PROCESSING  
 Line broadening 3.0 Hz  
 FT size 32768  
 Total time 0 min 0 sec

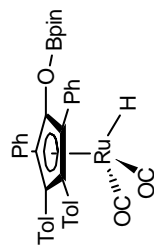

2  
<sup>11</sup>B NMR

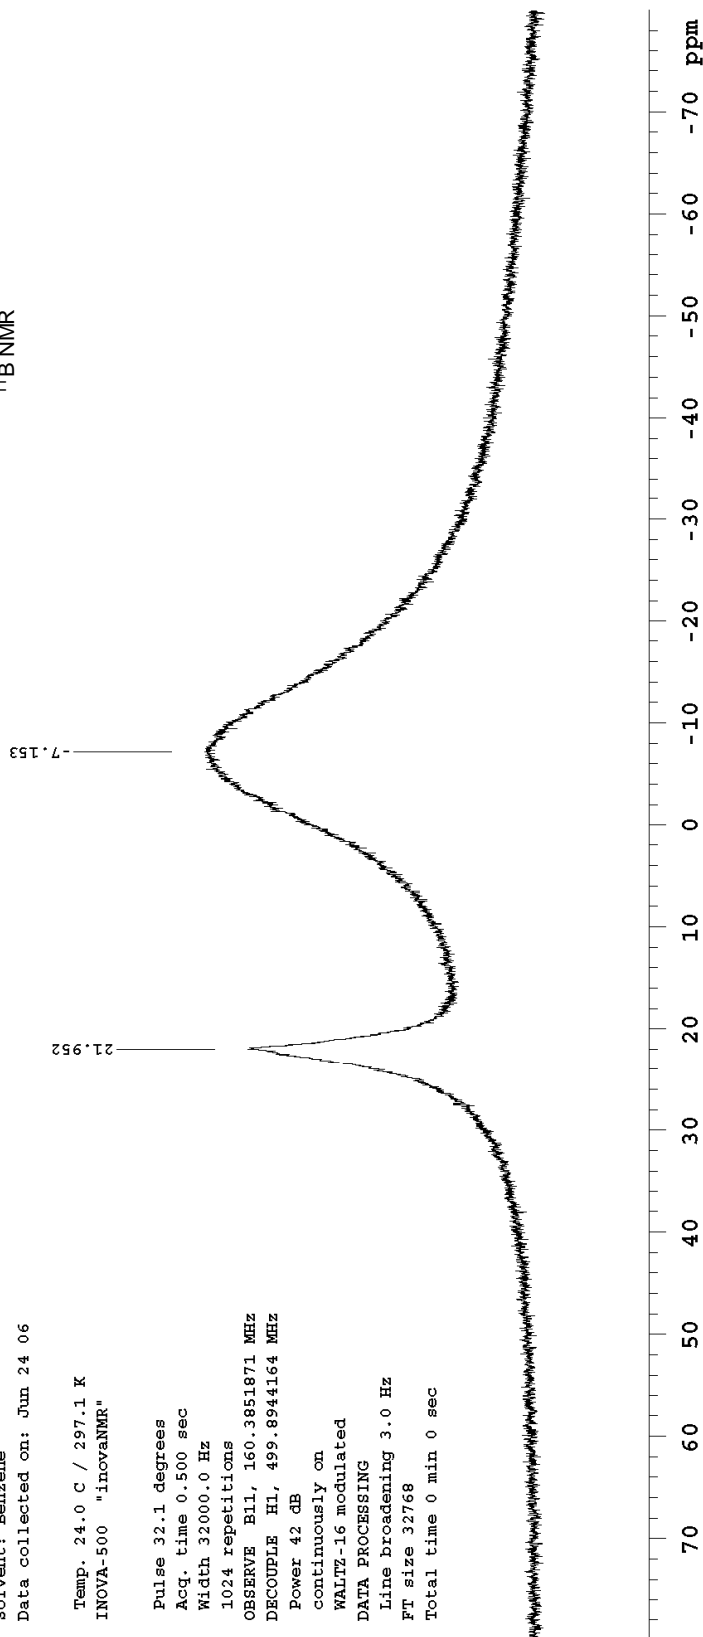

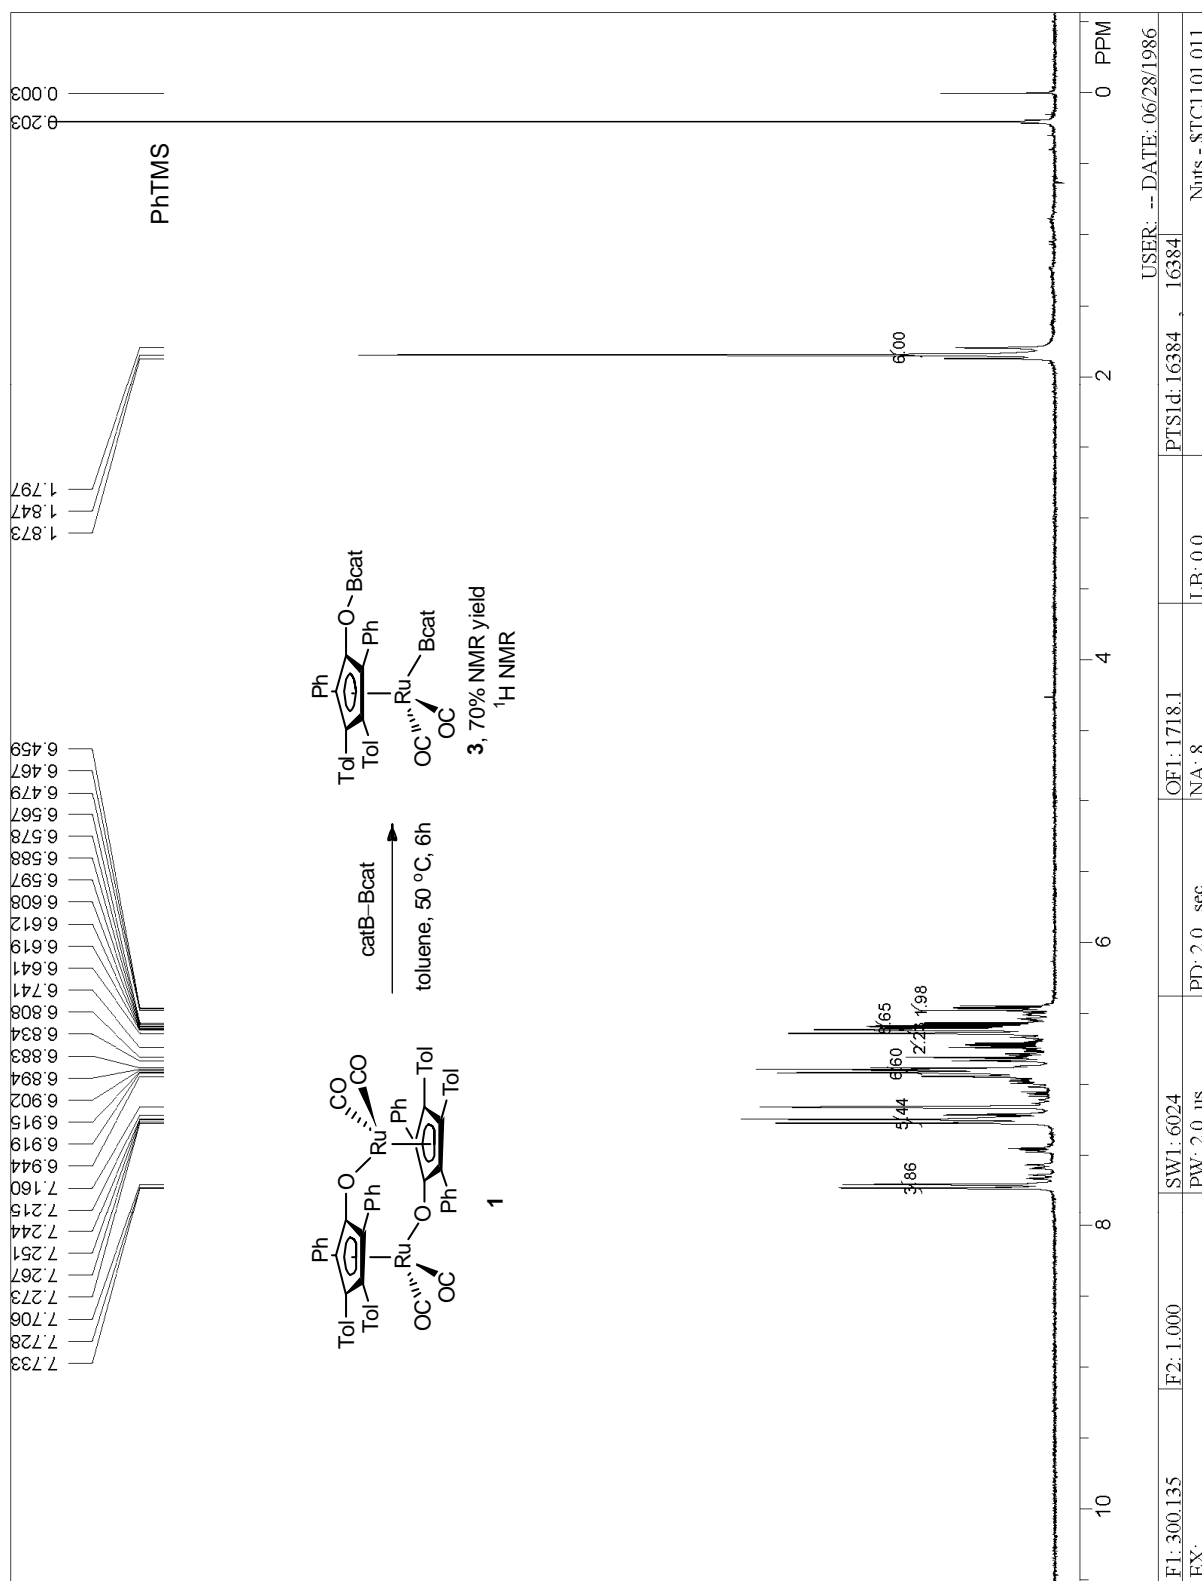

## STANDARD PROTON PARAMETERS

Sample Name:

Archive directory:

Sample directory:

FigFile: TC.1051.053

Pulse sequence: s2pul

Solvent: Benzene

Data collected on: May 21 06

Temp. 24.0 C / 297.1 K  
INOVA-500 "inovnmr"

Relax. delay 0.500 sec  
 Pulse 32.1 degrees  
 Acq. time 0.500 sec  
 Width 32000.0 Hz  
 512 repetitions  
 OBSERVE B11, 160.3851886 MHz  
 DECOUPLE H1, 499.8944164 MHz  
 Power 42 dB  
 continuously on  
 WALTZ-16 modulated  
 DATA PROCESSING  
 Line broadening 3.0 Hz  
 FT size 32768  
 Total time 0 min 0 sec

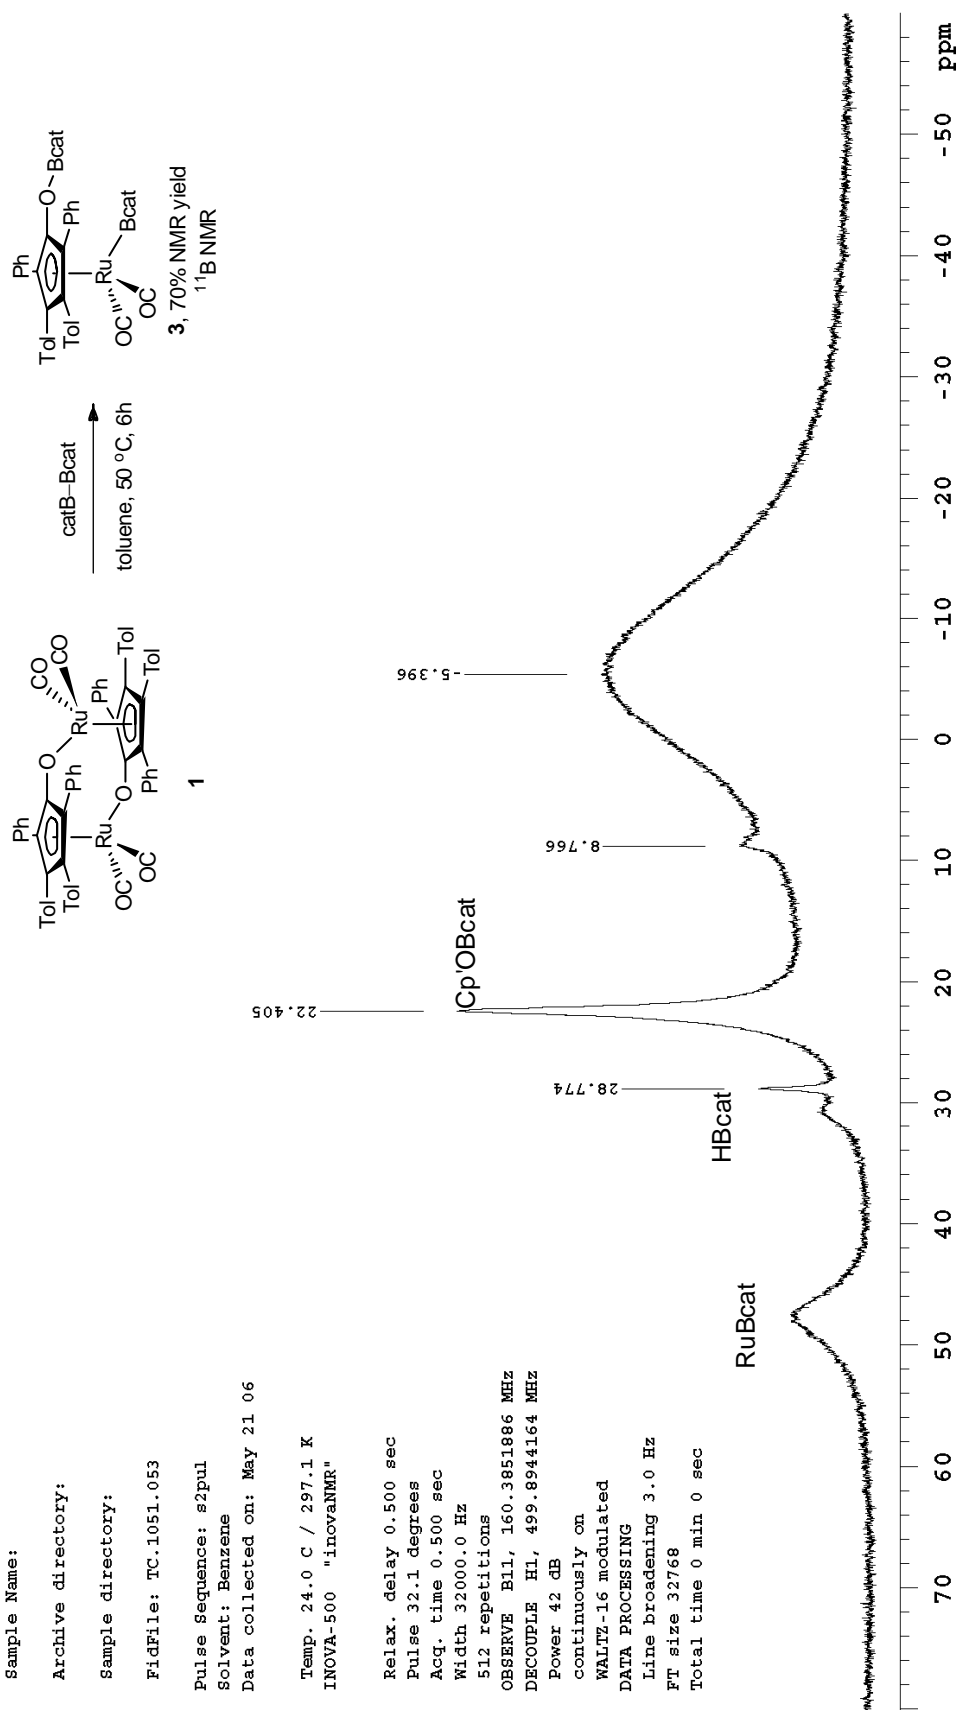

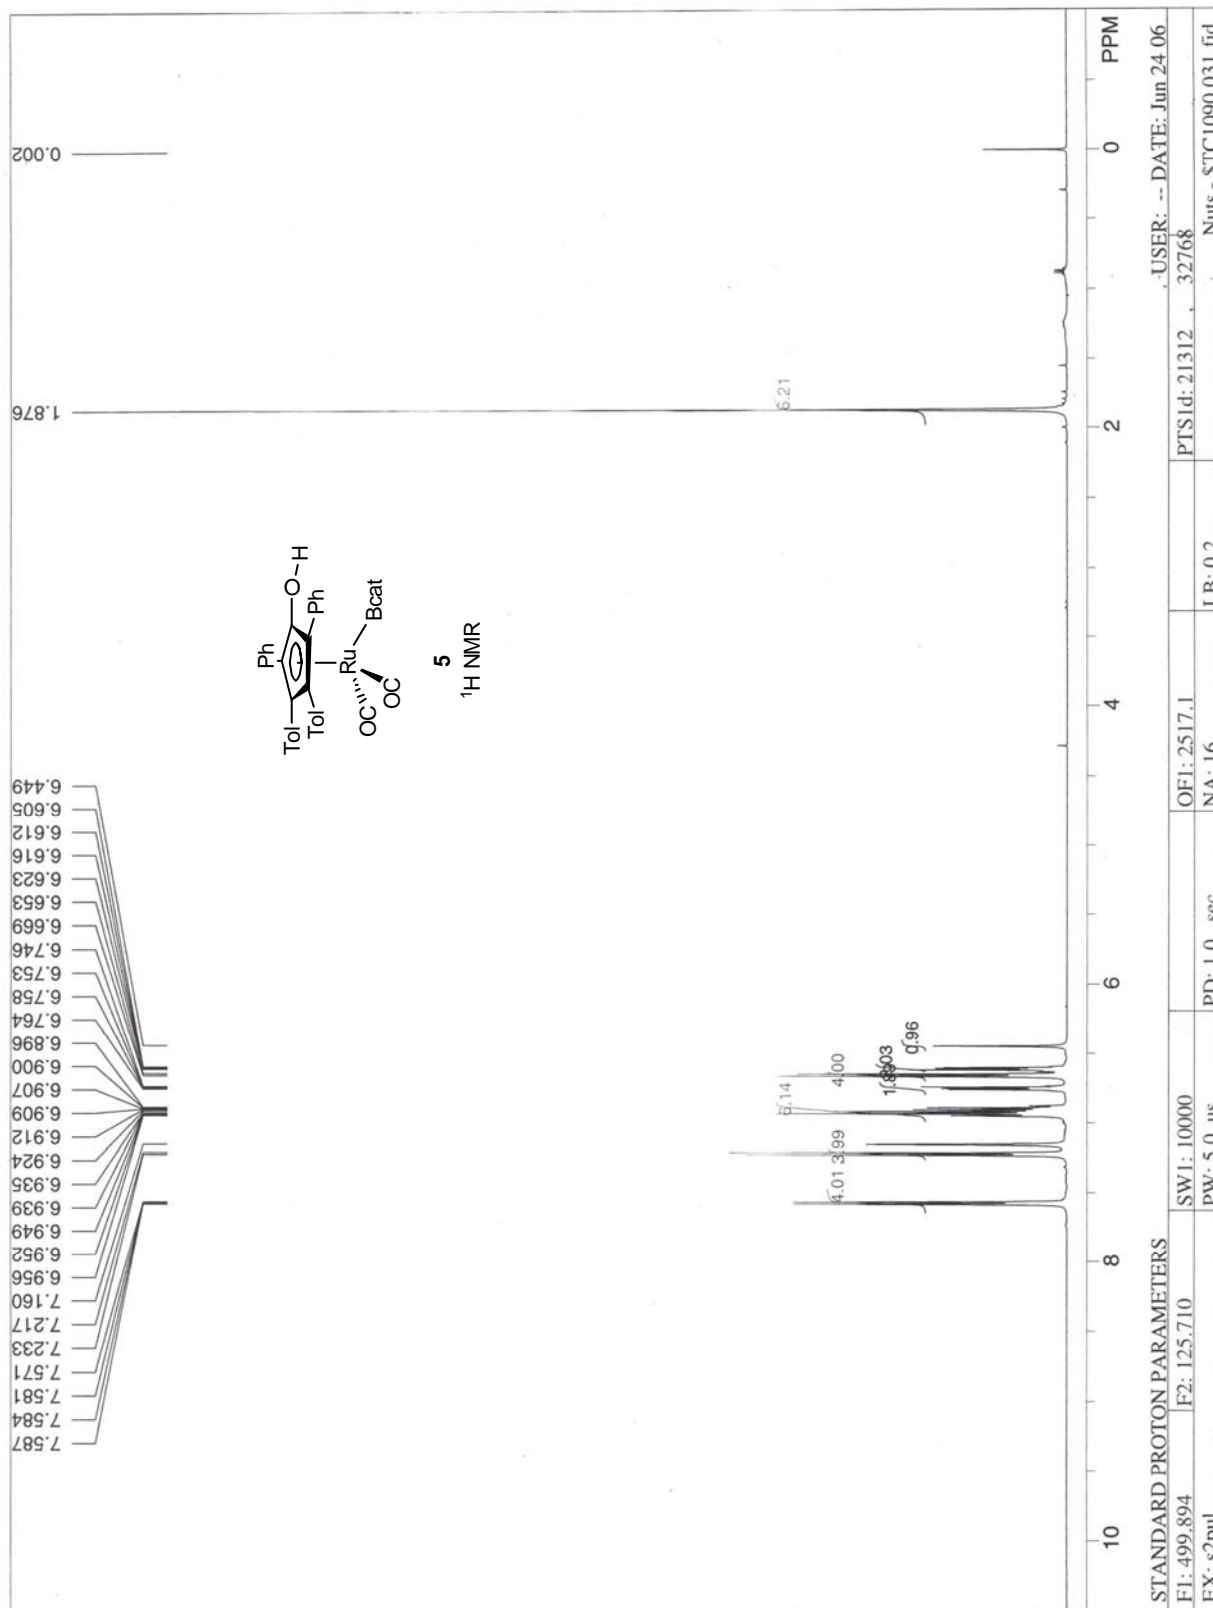

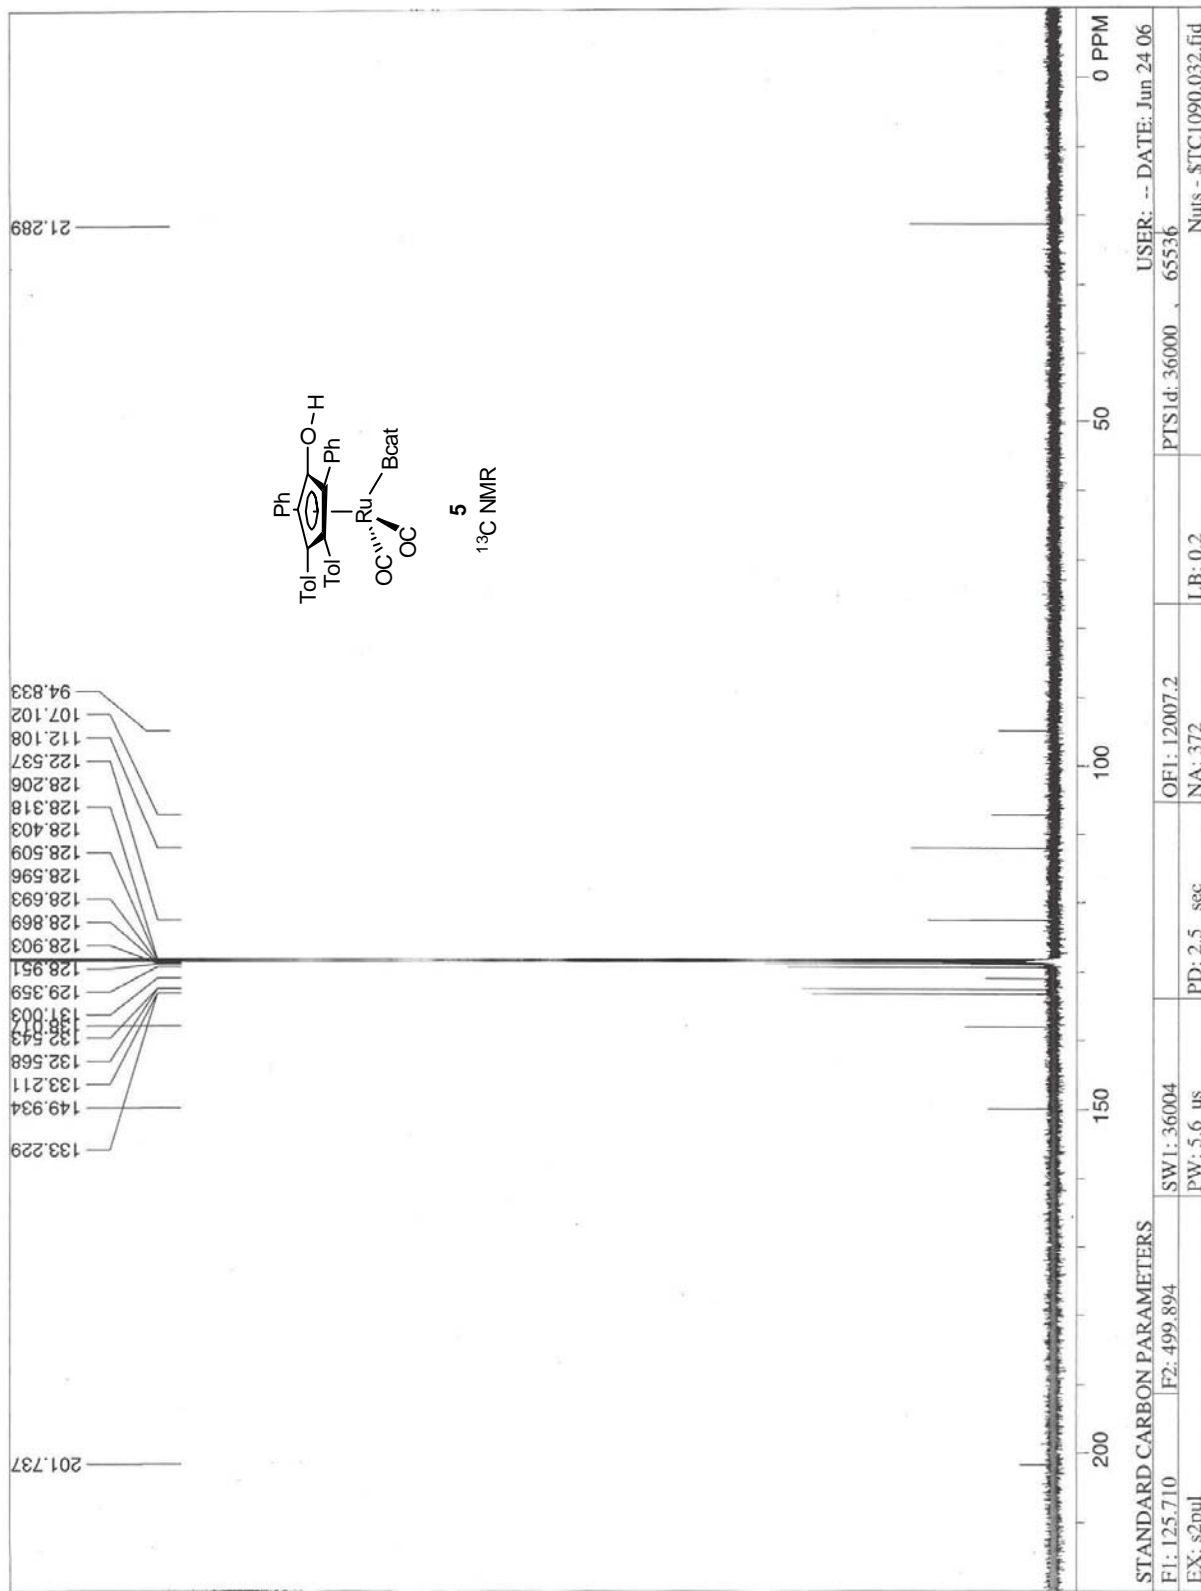

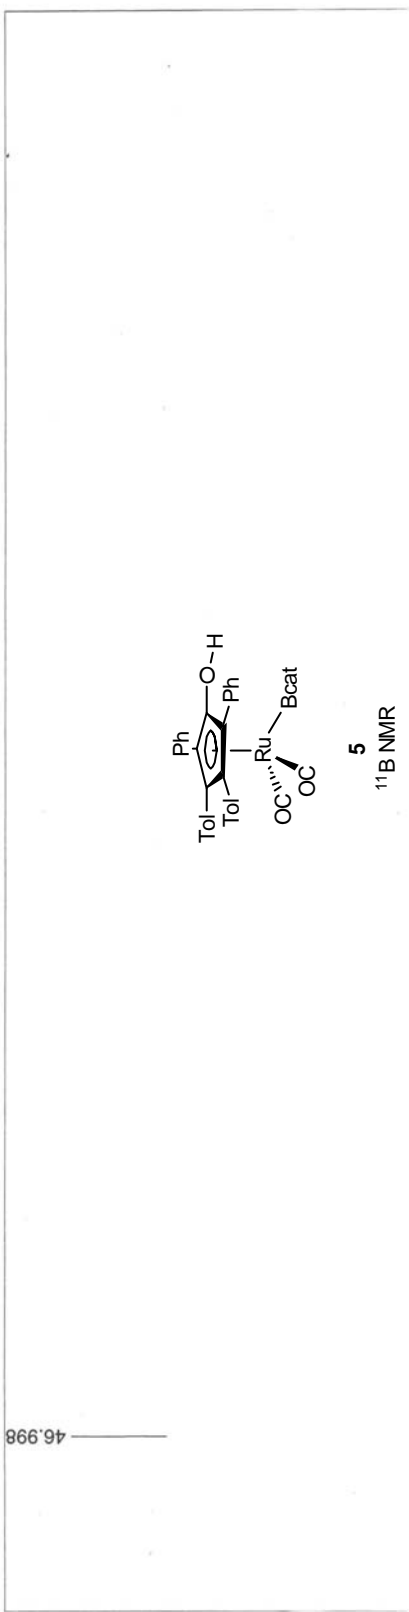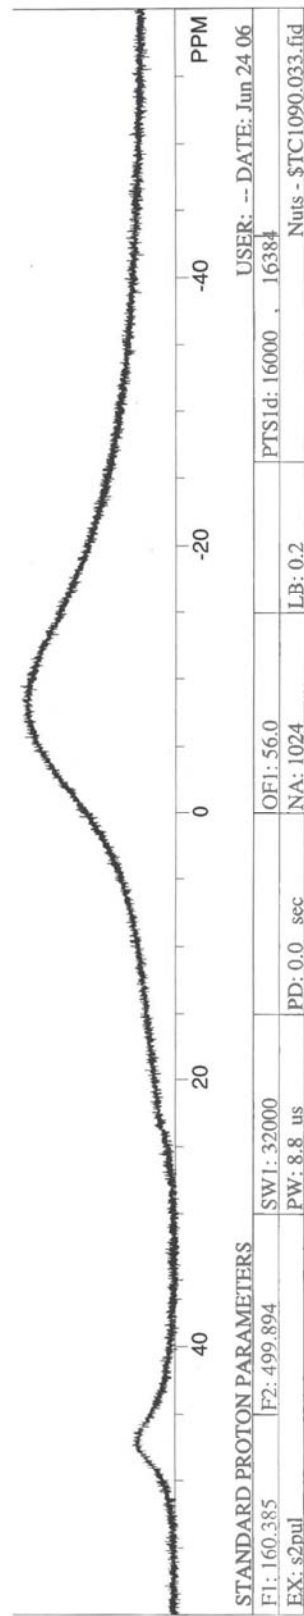



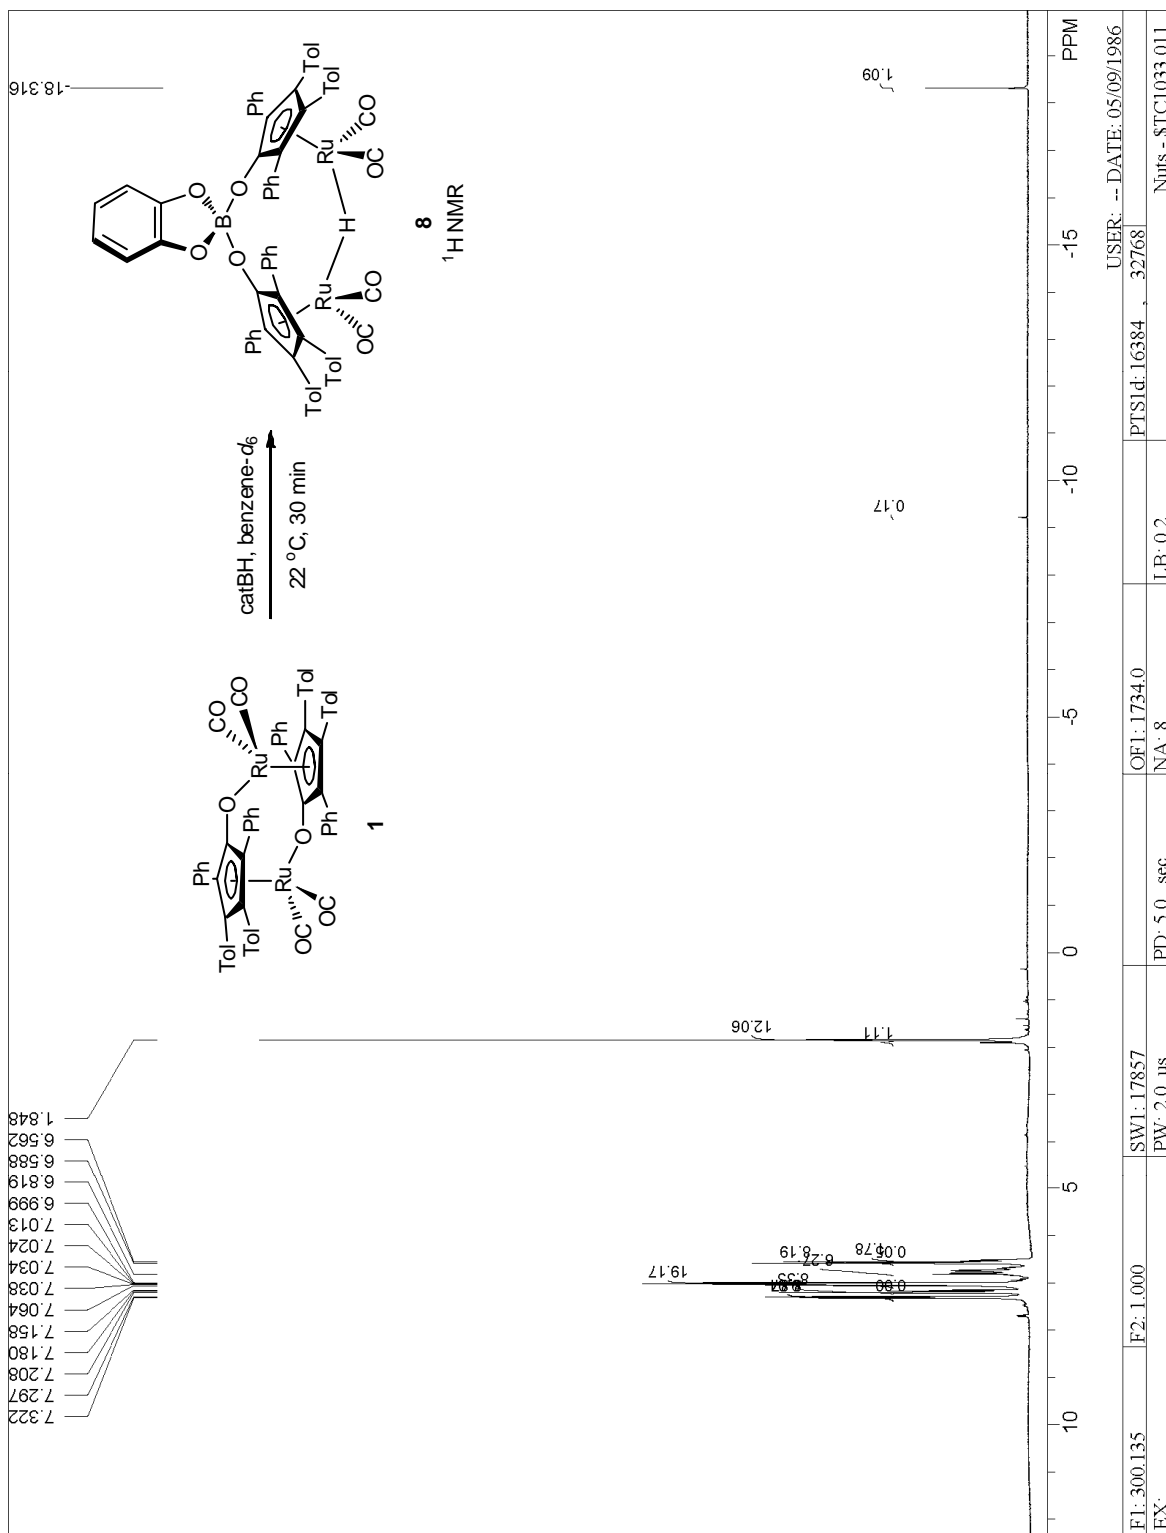

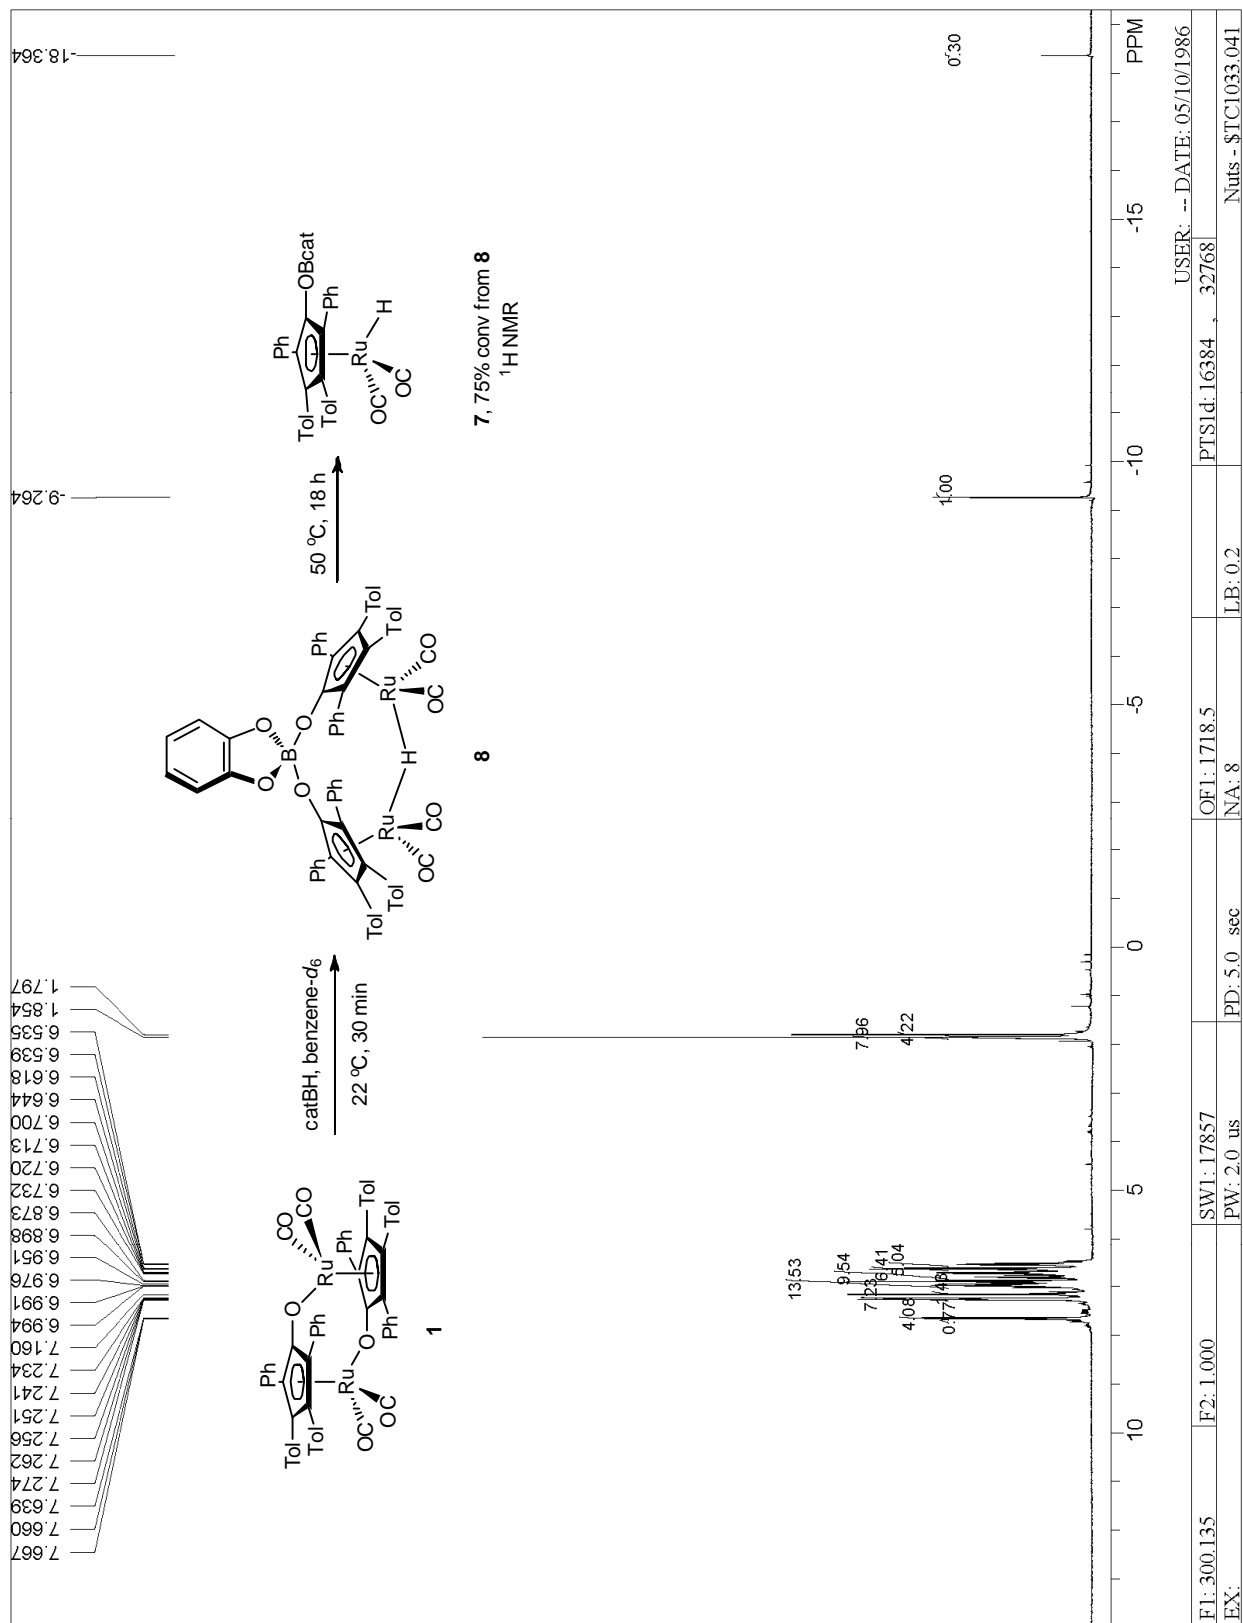

## STANDARD PROTON PARAMETERS

Sample Name:  
 Archive directory:  
 Sample directory:  
 File: TC1036.034  
 Pulse sequence: s2pul  
 Solvent: Benzene  
 Data collected on: May 11 06  
 Temp. 24.0 C / 297.1 K  
 INOVA-500 "inovaNMR"

Pulse 32.1 degrees  
 Acq. time 0.500 sec  
 Width 32000.0 Hz  
 512 repetitions  
 OBSERVE B11, 160.3855365 MHz  
 DECOUPLE H1, 499.8944164 MHz  
 Power 42 dB  
 continuously on  
 WALTZ-16 modulated  
 DATA PROCESSING  
 Line broadening 3.0 Hz  
 FT size 32768  
 Total time 0 min 0 sec

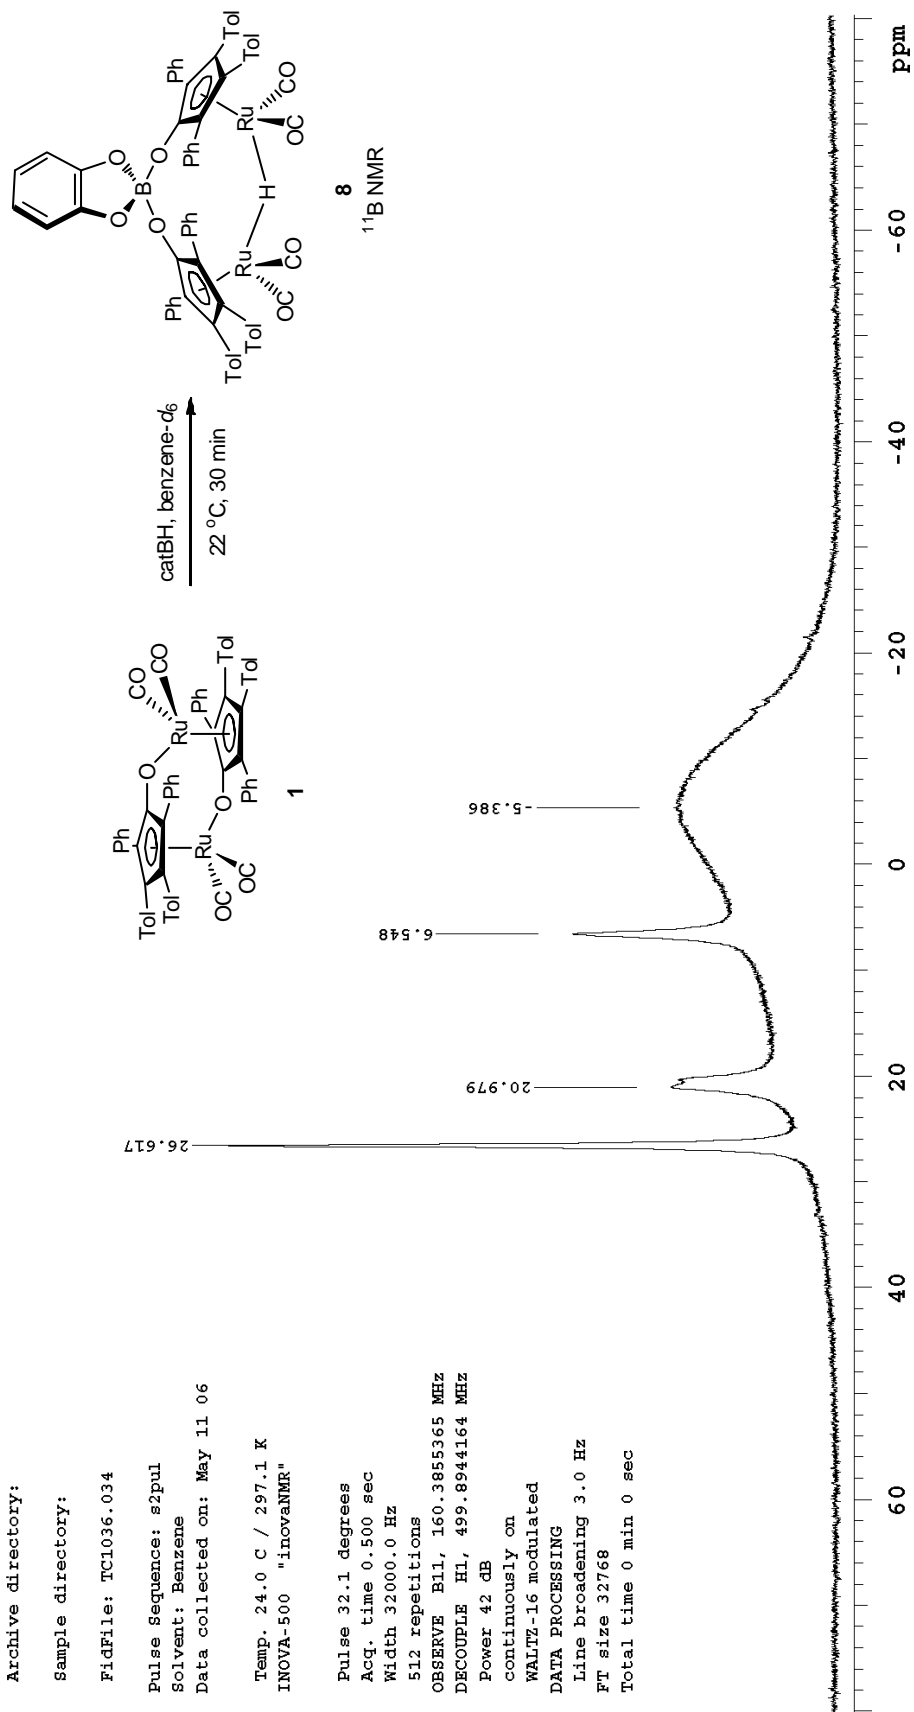

## II. X-ray Crystal Data of Complex 5

### Data Collection.

A yellow crystal with approximate dimensions 0.35 x 0.20 x 0.20 mm<sup>3</sup> was selected under oil under ambient conditions and attached to the tip of a nylon loop. The crystal was mounted in a stream of cold nitrogen at 100(2) K and centered in the X-ray beam by using a video camera.

The crystal evaluation and data collection were performed on a Bruker CCD-1000 diffractometer with Mo K<sub>α</sub> ( $\lambda = 0.71073 \text{ \AA}$ ) radiation and the diffractometer to crystal distance of 4.9 cm.

The initial cell constants were obtained from three series of  $\omega$  scans at different starting angles. Each series consisted of 20 frames collected at intervals of 0.3° in a 6° range about  $\omega$  with the exposure time of 10 seconds per frame. A total of 85 reflections were obtained. The reflections were successfully indexed by an automated indexing routine built in the SMART program. The final cell constants were calculated from a set of 9582 strong reflections from the actual data collection.

The data were collected by using the hemisphere data collection routine. The reciprocal space was surveyed to the extent of a full sphere to a resolution of 0.80 Å. A total of 41042 data were harvested by collecting three sets of frames with 0.25° scans in  $\omega$  with an exposure time 30 sec per frame. These highly redundant datasets were corrected for Lorentz and polarization effects. The absorption correction was based on fitting a function to the empirical transmission surface as sampled by multiple equivalent measurements. [1]

### Structure Solution and Refinement

The systematic absences in the diffraction data were uniquely consistent for the space group *C2/c* that yielded chemically reasonable and computationally stable results of refinement [1].

A successful solution by the direct methods provided most non-hydrogen atoms from the *E*-map. The remaining non-hydrogen atoms were located in an alternating series of least-squares cycles and difference Fourier maps. All non-hydrogen atoms were refined with anisotropic displacement coefficients. All hydrogen atoms were included in the structure factor calculation

at idealized positions and were allowed to ride on the neighboring atoms with relative isotropic displacement coefficients.

The final least-squares refinement of 418 parameters against 7745 data resulted in residuals  $R$  (based on  $F^2$  for  $I \geq 2\sigma$ ) and  $wR$  (based on  $F^2$  for all data) of 0.0476 and 0.1167, respectively. The final difference Fourier map was featureless.

#### **References**

- [1] **Bruker-AXS. (2000-2003) SADABS V.2.05, SAINT V.6.22, SHELXTL V.6.10 & SMART 5.622 Software Reference Manuals. Bruker-AXS, Madison, Wisconsin, USA.**

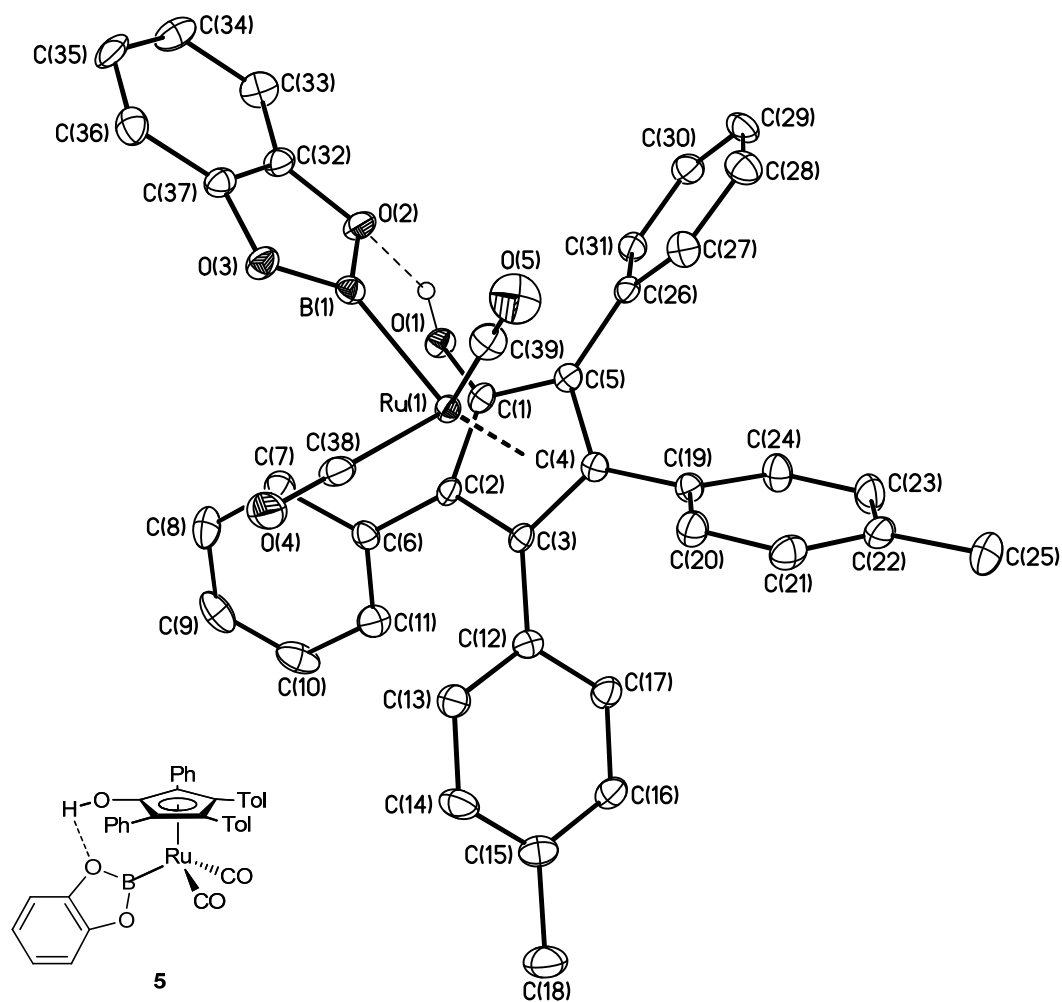

**Figure 2:** Molecular drawing of **5** shown with 50% probability ellipsoids. All hydrogen atoms except for the O-H are omitted for clarity. The one hydrogen bond is shown as the thin dashed line. The thick dashed line links Ru(1) to the center of the centroid.

Table 1. Crystal data and structure refinement for **5**.

|                                   |                                                    |                 |
|-----------------------------------|----------------------------------------------------|-----------------|
| Empirical formula                 | C <sub>39</sub> H <sub>29</sub> BO <sub>5</sub> Ru |                 |
| Formula weight                    | 689.50                                             |                 |
| Temperature                       | 100(2) K                                           |                 |
| Wavelength                        | 0.71073 Å                                          |                 |
| Crystal system                    | Monoclinic                                         |                 |
| Space group                       | C2/c                                               |                 |
| Unit cell dimensions              | a = 10.2918(11) Å                                  | α = 90°.        |
|                                   | b = 17.2418(19) Å                                  | β = 98.069(2)°. |
|                                   | c = 35.581(4) Å                                    | γ = 90°.        |
| Volume                            | 6251.3(12) Å <sup>3</sup>                          |                 |
| Z                                 | 8                                                  |                 |
| Density (calculated)              | 1.465 Mg/m <sup>3</sup>                            |                 |
| Absorption coefficient            | 0.547 mm <sup>-1</sup>                             |                 |
| F(000)                            | 2816                                               |                 |
| Crystal size                      | 0.35 x 0.20 x 0.20 mm <sup>3</sup>                 |                 |
| Theta range for data collection   | 1.16 to 28.32°.                                    |                 |
| Index ranges                      | -13 ≤ h ≤ 13, -22 ≤ k ≤ 22, -47 ≤ l ≤ 47           |                 |
| Reflections collected             | 41042                                              |                 |
| Independent reflections           | 7745 [R(int) = 0.0719]                             |                 |
| Completeness to theta = 28.32°    | 99.3 %                                             |                 |
| Absorption correction             | Multi-scan with SADABS                             |                 |
| Max. and min. transmission        | 0.8984 and 0.8316                                  |                 |
| Refinement method                 | Full-matrix least-squares on F <sup>2</sup>        |                 |
| Data / restraints / parameters    | 7745 / 0 / 418                                     |                 |
| Goodness-of-fit on F <sup>2</sup> | 1.030                                              |                 |
| Final R indices [I > 2σ(I)]       | R1 = 0.0476, wR2 = 0.1061                          |                 |
| R indices (all data)              | R1 = 0.0657, wR2 = 0.1167                          |                 |
| Largest diff. peak and hole       | 0.951 and -1.102 e.Å <sup>-3</sup>                 |                 |

Table 2. Atomic coordinates ( $\times 10^4$ ) and equivalent isotropic displacement parameters ( $\text{\AA}^2 \times 10^3$ ) for **5**.  $U(\text{eq})$  is defined as one third of the trace of the orthogonalized  $U^{\text{ij}}$  tensor.

|       | x       | y        | z       | U(eq) |
|-------|---------|----------|---------|-------|
| Ru(1) | 3622(1) | 520(1)   | 1174(1) | 13(1) |
| O(1)  | 4195(2) | 1038(1)  | 2077(1) | 18(1) |
| O(2)  | 3517(2) | -433(1)  | 1903(1) | 20(1) |
| O(3)  | 1993(2) | -884(1)  | 1424(1) | 20(1) |
| O(4)  | 892(2)  | 383(2)   | 744(1)  | 33(1) |
| O(5)  | 4577(3) | -799(2)  | 727(1)  | 34(1) |
| B(1)  | 2996(3) | -340(2)  | 1515(1) | 15(1) |
| C(1)  | 4354(3) | 1205(2)  | 1713(1) | 16(1) |
| C(2)  | 3449(3) | 1665(2)  | 1467(1) | 14(1) |
| C(3)  | 4053(3) | 1821(2)  | 1128(1) | 14(1) |
| C(4)  | 5270(3) | 1415(2)  | 1164(1) | 14(1) |
| C(5)  | 5457(3) | 1008(2)  | 1525(1) | 14(1) |
| C(6)  | 2217(3) | 1993(2)  | 1571(1) | 16(1) |
| C(7)  | 1334(3) | 1525(2)  | 1734(1) | 23(1) |
| C(8)  | 202(4)  | 1838(2)  | 1837(1) | 29(1) |
| C(9)  | -67(4)  | 2615(2)  | 1779(1) | 32(1) |
| C(10) | 773(4)  | 3080(2)  | 1623(1) | 29(1) |
| C(11) | 1934(3) | 2780(2)  | 1518(1) | 22(1) |
| C(12) | 3601(3) | 2416(2)  | 840(1)  | 16(1) |
| C(13) | 2362(3) | 2416(2)  | 627(1)  | 21(1) |
| C(14) | 1941(3) | 3031(2)  | 391(1)  | 25(1) |
| C(15) | 2737(3) | 3676(2)  | 365(1)  | 22(1) |
| C(16) | 3985(3) | 3675(2)  | 574(1)  | 21(1) |
| C(17) | 4416(3) | 3052(2)  | 806(1)  | 21(1) |
| C(18) | 2298(4) | 4350(2)  | 113(1)  | 32(1) |
| C(19) | 6219(3) | 1468(2)  | 889(1)  | 16(1) |
| C(20) | 5844(3) | 1290(2)  | 506(1)  | 20(1) |
| C(21) | 6734(3) | 1361(2)  | 249(1)  | 21(1) |
| C(22) | 8015(3) | 1600(2)  | 365(1)  | 21(1) |
| C(23) | 8371(3) | 1794(2)  | 743(1)  | 25(1) |
| C(24) | 7485(3) | 1732(2)  | 1003(1) | 21(1) |
| C(25) | 8975(4) | 1629(2)  | 83(1)   | 30(1) |
| C(26) | 6642(3) | 574(2)   | 1692(1) | 15(1) |
| C(27) | 7325(3) | 91(2)    | 1469(1) | 20(1) |
| C(28) | 8468(3) | -286(2)  | 1624(1) | 23(1) |
| C(29) | 8930(3) | -203(2)  | 2008(1) | 23(1) |
| C(30) | 8269(3) | 278(2)   | 2234(1) | 21(1) |
| C(31) | 7140(3) | 664(2)   | 2076(1) | 18(1) |
| C(32) | 2798(3) | -1025(2) | 2046(1) | 19(1) |
| C(33) | 2957(4) | -1335(2) | 2401(1) | 24(1) |
| C(34) | 2125(4) | -1952(2) | 2458(1) | 26(1) |



|       |         |          |         |       |
|-------|---------|----------|---------|-------|
| C(35) | 1195(4) | -2224(2) | 2164(1) | 25(1) |
| C(36) | 1062(3) | -1906(2) | 1810(1) | 22(1) |
| C(37) | 1889(3) | -1299(2) | 1754(1) | 18(1) |
| C(38) | 1926(3) | 430(2)   | 901(1)  | 21(1) |
| C(39) | 4212(3) | -307(2)  | 895(1)  | 21(1) |

---

Table 3. Bond lengths [Å] and angles [°] for **5**.

|                |          |              |          |
|----------------|----------|--------------|----------|
| Ru(1)-C(38)    | 1.881(3) | C(15)-C(16)  | 1.391(5) |
| Ru(1)-C(39)    | 1.886(3) | C(15)-C(18)  | 1.499(5) |
| Ru(1)-B(1)     | 2.075(4) | C(16)-C(17)  | 1.388(4) |
| Ru(1)-C(2)     | 2.250(3) | C(16)-H(16)  | 0.9500   |
| Ru(1)-C(5)     | 2.275(3) | C(17)-H(17)  | 0.9500   |
| Ru(1)-C(1)     | 2.286(3) | C(18)-H(18A) | 0.9800   |
| Ru(1)-C(3)     | 2.296(3) | C(18)-H(18B) | 0.9800   |
| Ru(1)-C(4)     | 2.297(3) | C(18)-H(18C) | 0.9800   |
| Ru(1)-centroid | 1.925(3) | C(19)-C(24)  | 1.386(4) |
| O(1)-C(1)      | 1.361(3) | C(19)-C(20)  | 1.397(4) |
| O(1)-H(1)      | 0.8400   | C(20)-C(21)  | 1.388(4) |
| O(2)-C(32)     | 1.397(4) | C(20)-H(20)  | 0.9500   |
| O(2)-B(1)      | 1.419(4) | C(21)-C(22)  | 1.388(5) |
| O(3)-C(37)     | 1.392(4) | C(21)-H(21)  | 0.9500   |
| O(3)-B(1)      | 1.399(4) | C(22)-C(23)  | 1.386(5) |
| O(4)-C(38)     | 1.134(4) | C(22)-C(25)  | 1.505(4) |
| O(5)-C(39)     | 1.132(4) | C(23)-C(24)  | 1.390(4) |
| C(1)-C(2)      | 1.425(4) | C(23)-H(23)  | 0.9500   |
| C(1)-C(5)      | 1.435(4) | C(24)-H(24)  | 0.9500   |
| C(2)-C(3)      | 1.457(4) | C(25)-H(25A) | 0.9800   |
| C(2)-C(6)      | 1.482(4) | C(25)-H(25B) | 0.9800   |
| C(3)-C(4)      | 1.425(4) | C(25)-H(25C) | 0.9800   |
| C(3)-C(12)     | 1.479(4) | C(26)-C(31)  | 1.400(4) |
| C(4)-C(5)      | 1.454(4) | C(26)-C(27)  | 1.403(4) |
| C(4)-C(19)     | 1.479(4) | C(27)-C(28)  | 1.389(5) |
| C(5)-C(26)     | 1.482(4) | C(27)-H(27)  | 0.9500   |
| C(6)-C(11)     | 1.394(5) | C(28)-C(29)  | 1.389(5) |
| C(6)-C(7)      | 1.401(5) | C(28)-H(28)  | 0.9500   |
| C(7)-C(8)      | 1.380(5) | C(29)-C(30)  | 1.396(5) |
| C(7)-H(7)      | 0.9500   | C(29)-H(29)  | 0.9500   |
| C(8)-C(9)      | 1.377(6) | C(30)-C(31)  | 1.387(4) |
| C(8)-H(8)      | 0.9500   | C(30)-H(30)  | 0.9500   |
| C(9)-C(10)     | 1.355(6) | C(31)-H(31)  | 0.9500   |
| C(9)-H(9)      | 0.9500   | C(32)-C(33)  | 1.363(4) |
| C(10)-C(11)    | 1.400(5) | C(32)-C(37)  | 1.380(4) |
| C(10)-H(10)    | 0.9500   | C(33)-C(34)  | 1.398(5) |
| C(11)-H(11)    | 0.9500   | C(33)-H(33)  | 0.9500   |
| C(12)-C(13)    | 1.389(4) | C(34)-C(35)  | 1.396(5) |
| C(12)-C(17)    | 1.396(4) | C(34)-H(34)  | 0.9500   |
| C(13)-C(14)    | 1.383(5) | C(35)-C(36)  | 1.362(5) |
| C(13)-H(13)    | 0.9500   | C(35)-H(35)  | 0.9500   |
| C(14)-C(15)    | 1.392(5) | C(36)-C(37)  | 1.382(5) |
| C(14)-H(14)    | 0.9500   | C(36)-H(36)  | 0.9500   |

|                   |            |                   |           |
|-------------------|------------|-------------------|-----------|
| C(38)-Ru(1)-C(39) | 90.55(14)  | C(4)-C(3)-C(2)    | 107.9(3)  |
| C(38)-Ru(1)-B(1)  | 84.27(14)  | C(4)-C(3)-C(12)   | 126.1(3)  |
| C(39)-Ru(1)-B(1)  | 85.21(14)  | C(2)-C(3)-C(12)   | 125.0(3)  |
| C(38)-Ru(1)-C(2)  | 100.60(13) | C(4)-C(3)-Ru(1)   | 71.94(17) |
| C(39)-Ru(1)-C(2)  | 163.57(13) | C(2)-C(3)-Ru(1)   | 69.60(17) |
| B(1)-Ru(1)-C(2)   | 107.71(12) | C(12)-C(3)-Ru(1)  | 132.9(2)  |
| C(38)-Ru(1)-C(5)  | 162.38(13) | C(3)-C(4)-C(5)    | 108.7(3)  |
| C(39)-Ru(1)-C(5)  | 105.38(13) | C(3)-C(4)-C(19)   | 124.4(3)  |
| B(1)-Ru(1)-C(5)   | 104.18(12) | C(5)-C(4)-C(19)   | 126.7(3)  |
| C(2)-Ru(1)-C(5)   | 62.26(11)  | C(3)-C(4)-Ru(1)   | 71.90(17) |
| C(38)-Ru(1)-C(1)  | 130.39(13) | C(5)-C(4)-Ru(1)   | 70.64(16) |
| C(39)-Ru(1)-C(1)  | 137.64(13) | C(19)-C(4)-Ru(1)  | 127.5(2)  |
| B(1)-Ru(1)-C(1)   | 88.36(12)  | C(1)-C(5)-C(4)    | 106.4(3)  |
| C(2)-Ru(1)-C(1)   | 36.60(10)  | C(1)-C(5)-C(26)   | 126.4(3)  |
| C(5)-Ru(1)-C(1)   | 36.68(11)  | C(4)-C(5)-C(26)   | 126.6(3)  |
| C(38)-Ru(1)-C(3)  | 102.67(12) | C(1)-C(5)-Ru(1)   | 72.09(17) |
| C(39)-Ru(1)-C(3)  | 128.44(13) | C(4)-C(5)-Ru(1)   | 72.29(16) |
| B(1)-Ru(1)-C(3)   | 144.91(12) | C(26)-C(5)-Ru(1)  | 127.3(2)  |
| C(2)-Ru(1)-C(3)   | 37.37(10)  | C(11)-C(6)-C(7)   | 118.7(3)  |
| C(5)-Ru(1)-C(3)   | 61.58(10)  | C(11)-C(6)-C(2)   | 120.6(3)  |
| C(1)-Ru(1)-C(3)   | 60.74(10)  | C(7)-C(6)-C(2)    | 120.7(3)  |
| C(38)-Ru(1)-C(4)  | 132.99(12) | C(8)-C(7)-C(6)    | 120.4(3)  |
| C(39)-Ru(1)-C(4)  | 101.93(13) | C(8)-C(7)-H(7)    | 119.8     |
| B(1)-Ru(1)-C(4)   | 141.23(12) | C(6)-C(7)-H(7)    | 119.8     |
| C(2)-Ru(1)-C(4)   | 61.64(11)  | C(9)-C(8)-C(7)    | 120.1(3)  |
| C(5)-Ru(1)-C(4)   | 37.08(10)  | C(9)-C(8)-H(8)    | 120.0     |
| C(1)-Ru(1)-C(4)   | 60.62(10)  | C(7)-C(8)-H(8)    | 120.0     |
| C(3)-Ru(1)-C(4)   | 36.15(11)  | C(10)-C(9)-C(8)   | 120.7(3)  |
| C(1)-O(1)-H(1)    | 109.5      | C(10)-C(9)-H(9)   | 119.7     |
| C(32)-O(2)-B(1)   | 106.8(2)   | C(8)-C(9)-H(9)    | 119.7     |
| C(37)-O(3)-B(1)   | 106.9(2)   | C(9)-C(10)-C(11)  | 120.6(3)  |
| O(3)-B(1)-O(2)    | 108.4(3)   | C(9)-C(10)-H(10)  | 119.7     |
| O(3)-B(1)-Ru(1)   | 128.6(2)   | C(11)-C(10)-H(10) | 119.7     |
| O(2)-B(1)-Ru(1)   | 123.0(2)   | C(6)-C(11)-C(10)  | 119.6(3)  |
| O(1)-C(1)-C(2)    | 123.1(3)   | C(6)-C(11)-H(11)  | 120.2     |
| O(1)-C(1)-C(5)    | 127.0(3)   | C(10)-C(11)-H(11) | 120.2     |
| C(2)-C(1)-C(5)    | 109.8(3)   | C(13)-C(12)-C(17) | 118.0(3)  |
| O(1)-C(1)-Ru(1)   | 128.4(2)   | C(13)-C(12)-C(3)  | 123.6(3)  |
| C(2)-C(1)-Ru(1)   | 70.32(17)  | C(17)-C(12)-C(3)  | 118.0(3)  |
| C(5)-C(1)-Ru(1)   | 71.22(16)  | C(14)-C(13)-C(12) | 121.0(3)  |
| C(1)-C(2)-C(3)    | 107.0(3)   | C(14)-C(13)-H(13) | 119.5     |
| C(1)-C(2)-C(6)    | 124.7(3)   | C(12)-C(13)-H(13) | 119.5     |
| C(3)-C(2)-C(6)    | 127.9(3)   | C(13)-C(14)-C(15) | 121.1(3)  |
| C(1)-C(2)-Ru(1)   | 73.08(17)  | C(13)-C(14)-H(14) | 119.5     |
| C(3)-C(2)-Ru(1)   | 73.03(17)  | C(15)-C(14)-H(14) | 119.5     |
| C(6)-C(2)-Ru(1)   | 125.2(2)   | C(16)-C(15)-C(14) | 118.1(3)  |

|                     |          |                   |          |
|---------------------|----------|-------------------|----------|
| C(16)-C(15)-C(18)   | 120.0(3) | C(29)-C(28)-H(28) | 120.2    |
| C(14)-C(15)-C(18)   | 121.9(3) | C(28)-C(29)-C(30) | 120.0(3) |
| C(17)-C(16)-C(15)   | 120.9(3) | C(28)-C(29)-H(29) | 120.0    |
| C(17)-C(16)-H(16)   | 119.6    | C(30)-C(29)-H(29) | 120.0    |
| C(15)-C(16)-H(16)   | 119.6    | C(31)-C(30)-C(29) | 120.0(3) |
| C(16)-C(17)-C(12)   | 120.9(3) | C(31)-C(30)-H(30) | 120.0    |
| C(16)-C(17)-H(17)   | 119.6    | C(29)-C(30)-H(30) | 120.0    |
| C(12)-C(17)-H(17)   | 119.6    | C(30)-C(31)-C(26) | 120.8(3) |
| C(15)-C(18)-H(18A)  | 109.5    | C(30)-C(31)-H(31) | 119.6    |
| C(15)-C(18)-H(18B)  | 109.5    | C(26)-C(31)-H(31) | 119.6    |
| H(18A)-C(18)-H(18B) | 109.5    | C(33)-C(32)-C(37) | 123.1(3) |
| C(15)-C(18)-H(18C)  | 109.5    | C(33)-C(32)-O(2)  | 128.5(3) |
| H(18A)-C(18)-H(18C) | 109.5    | C(37)-C(32)-O(2)  | 108.4(3) |
| H(18B)-C(18)-H(18C) | 109.5    | C(32)-C(33)-C(34) | 115.8(3) |
| C(24)-C(19)-C(20)   | 118.5(3) | C(32)-C(33)-H(33) | 122.1    |
| C(24)-C(19)-C(4)    | 120.5(3) | C(34)-C(33)-H(33) | 122.1    |
| C(20)-C(19)-C(4)    | 120.9(3) | C(35)-C(34)-C(33) | 121.2(3) |
| C(21)-C(20)-C(19)   | 120.4(3) | C(35)-C(34)-H(34) | 119.4    |
| C(21)-C(20)-H(20)   | 119.8    | C(33)-C(34)-H(34) | 119.4    |
| C(19)-C(20)-H(20)   | 119.8    | C(36)-C(35)-C(34) | 121.8(3) |
| C(22)-C(21)-C(20)   | 121.2(3) | C(36)-C(35)-H(35) | 119.1    |
| C(22)-C(21)-H(21)   | 119.4    | C(34)-C(35)-H(35) | 119.1    |
| C(20)-C(21)-H(21)   | 119.4    | C(35)-C(36)-C(37) | 117.1(3) |
| C(23)-C(22)-C(21)   | 118.0(3) | C(35)-C(36)-H(36) | 121.4    |
| C(23)-C(22)-C(25)   | 122.1(3) | C(37)-C(36)-H(36) | 121.4    |
| C(21)-C(22)-C(25)   | 119.8(3) | C(32)-C(37)-C(36) | 121.0(3) |
| C(22)-C(23)-C(24)   | 121.3(3) | C(32)-C(37)-O(3)  | 109.5(3) |
| C(22)-C(23)-H(23)   | 119.4    | C(36)-C(37)-O(3)  | 129.4(3) |
| C(24)-C(23)-H(23)   | 119.4    | O(4)-C(38)-Ru(1)  | 178.4(3) |
| C(19)-C(24)-C(23)   | 120.6(3) | O(5)-C(39)-Ru(1)  | 179.3(3) |
| C(19)-C(24)-H(24)   | 119.7    |                   |          |
| C(23)-C(24)-H(24)   | 119.7    |                   |          |
| C(22)-C(25)-H(25A)  | 109.5    |                   |          |
| C(22)-C(25)-H(25B)  | 109.5    |                   |          |
| H(25A)-C(25)-H(25B) | 109.5    |                   |          |
| C(22)-C(25)-H(25C)  | 109.5    |                   |          |
| H(25A)-C(25)-H(25C) | 109.5    |                   |          |
| H(25B)-C(25)-H(25C) | 109.5    |                   |          |
| C(31)-C(26)-C(27)   | 118.2(3) |                   |          |
| C(31)-C(26)-C(5)    | 120.2(3) |                   |          |
| C(27)-C(26)-C(5)    | 121.6(3) |                   |          |
| C(28)-C(27)-C(26)   | 121.2(3) |                   |          |
| C(28)-C(27)-H(27)   | 119.4    |                   |          |
| C(26)-C(27)-H(27)   | 119.4    |                   |          |
| C(27)-C(28)-C(29)   | 119.7(3) |                   |          |
| C(27)-C(28)-H(28)   | 120.2    |                   |          |

---

Symmetry transformations used to generate equivalent atoms:

Table 4. Anisotropic displacement parameters ( $\text{\AA}^2 \times 10^3$ ) for **5**. The anisotropic displacement factor exponent takes the form:  $-2\pi^2 [ h^2 a^{*2} U^{11} + \dots + 2 h k a^* b^* U^{12} ]$

|       | $U^{11}$ | $U^{22}$ | $U^{33}$ | $U^{23}$ | $U^{13}$ | $U^{12}$ |
|-------|----------|----------|----------|----------|----------|----------|
| Ru(1) | 12(1)    | 15(1)    | 12(1)    | 1(1)     | 1(1)     | -2(1)    |
| O(1)  | 21(1)    | 20(1)    | 12(1)    | 1(1)     | 2(1)     | -1(1)    |
| O(2)  | 23(1)    | 16(1)    | 19(1)    | 4(1)     | 2(1)     | -3(1)    |
| O(3)  | 22(1)    | 21(1)    | 16(1)    | 4(1)     | 1(1)     | -4(1)    |
| O(4)  | 24(1)    | 29(2)    | 41(2)    | 9(1)     | -13(1)   | -8(1)    |
| O(5)  | 43(2)    | 33(2)    | 27(1)    | -12(1)   | 9(1)     | 4(1)     |
| B(1)  | 15(2)    | 15(2)    | 16(2)    | 0(1)     | 3(1)     | 2(1)     |
| C(1)  | 17(2)    | 15(2)    | 14(1)    | -2(1)    | 2(1)     | -4(1)    |
| C(2)  | 14(1)    | 16(2)    | 13(1)    | 2(1)     | 1(1)     | -5(1)    |
| C(3)  | 14(1)    | 13(2)    | 14(1)    | -1(1)    | 1(1)     | -4(1)    |
| C(4)  | 14(1)    | 15(2)    | 13(1)    | -2(1)    | 1(1)     | -2(1)    |
| C(5)  | 15(1)    | 15(2)    | 12(1)    | -1(1)    | -1(1)    | -3(1)    |
| C(6)  | 14(2)    | 20(2)    | 14(1)    | 0(1)     | 0(1)     | 1(1)     |
| C(7)  | 21(2)    | 20(2)    | 30(2)    | 0(1)     | 8(1)     | 1(1)     |
| C(8)  | 21(2)    | 35(2)    | 35(2)    | -1(2)    | 13(2)    | -5(2)    |
| C(9)  | 19(2)    | 41(2)    | 35(2)    | -7(2)    | 4(2)     | 12(2)    |
| C(10) | 33(2)    | 27(2)    | 25(2)    | -3(1)    | 3(1)     | 16(2)    |
| C(11) | 25(2)    | 22(2)    | 22(2)    | 0(1)     | 5(1)     | 1(1)     |
| C(12) | 19(2)    | 15(2)    | 15(1)    | 0(1)     | 3(1)     | 1(1)     |
| C(13) | 19(2)    | 17(2)    | 26(2)    | 0(1)     | -2(1)    | -4(1)    |
| C(14) | 24(2)    | 23(2)    | 26(2)    | 4(1)     | -8(1)    | 1(1)     |
| C(15) | 29(2)    | 20(2)    | 17(2)    | 1(1)     | 2(1)     | 2(1)     |
| C(16) | 23(2)    | 19(2)    | 21(2)    | 2(1)     | 4(1)     | -4(1)    |
| C(17) | 19(2)    | 25(2)    | 17(2)    | 4(1)     | 0(1)     | -5(1)    |
| C(18) | 35(2)    | 23(2)    | 35(2)    | 9(2)     | -4(2)    | -1(2)    |
| C(19) | 15(2)    | 16(2)    | 16(1)    | 0(1)     | 4(1)     | 1(1)     |
| C(20) | 19(2)    | 24(2)    | 18(2)    | 0(1)     | 3(1)     | -2(1)    |
| C(21) | 26(2)    | 24(2)    | 15(1)    | 2(1)     | 5(1)     | 0(1)     |
| C(22) | 23(2)    | 21(2)    | 23(2)    | 6(1)     | 10(1)    | 4(1)     |
| C(23) | 16(2)    | 34(2)    | 25(2)    | 3(1)     | 2(1)     | -3(1)    |
| C(24) | 16(2)    | 29(2)    | 17(1)    | -3(1)    | 1(1)     | -4(1)    |
| C(25) | 26(2)    | 38(2)    | 29(2)    | 8(2)     | 13(2)    | 0(2)     |
| C(26) | 14(1)    | 14(2)    | 17(1)    | 2(1)     | 1(1)     | -3(1)    |
| C(27) | 19(2)    | 22(2)    | 17(1)    | -4(1)    | 0(1)     | -2(1)    |
| C(28) | 23(2)    | 18(2)    | 27(2)    | -4(1)    | 1(1)     | 2(1)     |
| C(29) | 14(2)    | 19(2)    | 34(2)    | 1(1)     | -5(1)    | 2(1)     |
| C(30) | 20(2)    | 22(2)    | 20(2)    | 4(1)     | -3(1)    | -2(1)    |
| C(31) | 17(2)    | 20(2)    | 18(1)    | 2(1)     | 2(1)     | -1(1)    |
| C(32) | 21(2)    | 13(2)    | 22(2)    | 1(1)     | 6(1)     | 1(1)     |
| C(33) | 29(2)    | 26(2)    | 17(2)    | -2(1)    | 2(1)     | 0(2)     |
| C(34) | 40(2)    | 20(2)    | 21(2)    | 4(1)     | 11(1)    | -2(2)    |

|       |       |       |       |       |       |       |
|-------|-------|-------|-------|-------|-------|-------|
| C(35) | 29(2) | 12(2) | 37(2) | 2(1)  | 14(2) | -6(1) |
| C(36) | 20(2) | 21(2) | 27(2) | -6(1) | 3(1)  | -2(1) |
| C(37) | 20(2) | 16(2) | 17(1) | 2(1)  | 6(1)  | 1(1)  |
| C(38) | 24(2) | 16(2) | 21(2) | 4(1)  | -2(1) | -4(1) |
| C(39) | 24(2) | 24(2) | 15(1) | -1(1) | 1(1)  | -1(1) |

---

Table 5. Hydrogen coordinates ( $\times 10^4$ ) and isotropic displacement parameters ( $\text{\AA}^2 \times 10^3$ ) for **5**.

|        | x    | y     | z    | U(eq) |
|--------|------|-------|------|-------|
| H(1)   | 4227 | 556   | 2110 | 26    |
| H(7)   | 1515 | 988   | 1773 | 28    |
| H(8)   | -392 | 1518  | 1948 | 35    |
| H(9)   | -849 | 2827  | 1850 | 38    |
| H(10)  | 572  | 3614  | 1584 | 34    |
| H(11)  | 2526 | 3110  | 1412 | 27    |
| H(13)  | 1794 | 1986  | 643  | 25    |
| H(14)  | 1095 | 3014  | 245  | 30    |
| H(16)  | 4551 | 4105  | 558  | 25    |
| H(17)  | 5277 | 3059  | 943  | 25    |
| H(18A) | 2245 | 4192  | -153 | 48    |
| H(18B) | 2928 | 4776  | 164  | 48    |
| H(18C) | 1432 | 4524  | 163  | 48    |
| H(20)  | 4974 | 1120  | 421  | 24    |
| H(21)  | 6461 | 1245  | -11  | 26    |
| H(23)  | 9237 | 1972  | 827  | 30    |
| H(24)  | 7750 | 1872  | 1260 | 25    |
| H(25A) | 9514 | 2098  | 126  | 45    |
| H(25B) | 8494 | 1638  | -175 | 45    |
| H(25C) | 9541 | 1170  | 114  | 45    |
| H(27)  | 6998 | 21    | 1208 | 24    |
| H(28)  | 8933 | -599  | 1468 | 28    |
| H(29)  | 9695 | -474  | 2117 | 28    |
| H(30)  | 8594 | 342   | 2495 | 25    |
| H(31)  | 6700 | 994   | 2231 | 22    |
| H(33)  | 3593 | -1143 | 2599 | 29    |
| H(34)  | 2193 | -2190 | 2701 | 31    |
| H(35)  | 641  | -2643 | 2212 | 30    |
| H(36)  | 427  | -2094 | 1611 | 27    |

Table 6. Torsion angles [°] for **5**.

|                       |             |
|-----------------------|-------------|
| C(37)-O(3)-B(1)-O(2)  | 0.7(3)      |
| C(37)-O(3)-B(1)-Ru(1) | -176.0(2)   |
| C(32)-O(2)-B(1)-O(3)  | -1.3(3)     |
| C(32)-O(2)-B(1)-Ru(1) | 175.7(2)    |
| C(38)-Ru(1)-B(1)-O(3) | 23.4(3)     |
| C(39)-Ru(1)-B(1)-O(3) | -67.7(3)    |
| C(2)-Ru(1)-B(1)-O(3)  | 122.7(3)    |
| C(5)-Ru(1)-B(1)-O(3)  | -172.4(3)   |
| C(1)-Ru(1)-B(1)-O(3)  | 154.2(3)    |
| C(3)-Ru(1)-B(1)-O(3)  | 127.3(3)    |
| C(4)-Ru(1)-B(1)-O(3)  | -170.8(2)   |
| C(38)-Ru(1)-B(1)-O(2) | -152.9(3)   |
| C(39)-Ru(1)-B(1)-O(2) | 116.0(3)    |
| C(2)-Ru(1)-B(1)-O(2)  | -53.6(3)    |
| C(5)-Ru(1)-B(1)-O(2)  | 11.3(3)     |
| C(1)-Ru(1)-B(1)-O(2)  | -22.1(3)    |
| C(3)-Ru(1)-B(1)-O(2)  | -49.0(4)    |
| C(4)-Ru(1)-B(1)-O(2)  | 12.9(4)     |
| C(38)-Ru(1)-C(1)-O(1) | 75.0(3)     |
| C(39)-Ru(1)-C(1)-O(1) | -87.2(3)    |
| B(1)-Ru(1)-C(1)-O(1)  | -6.1(3)     |
| C(2)-Ru(1)-C(1)-O(1)  | 117.2(3)    |
| C(5)-Ru(1)-C(1)-O(1)  | -122.8(4)   |
| C(3)-Ru(1)-C(1)-O(1)  | 156.5(3)    |
| C(4)-Ru(1)-C(1)-O(1)  | -161.8(3)   |
| C(38)-Ru(1)-C(1)-C(2) | -42.2(2)    |
| C(39)-Ru(1)-C(1)-C(2) | 155.6(2)    |
| B(1)-Ru(1)-C(1)-C(2)  | -123.29(19) |
| C(5)-Ru(1)-C(1)-C(2)  | 120.1(3)    |
| C(3)-Ru(1)-C(1)-C(2)  | 39.33(17)   |
| C(4)-Ru(1)-C(1)-C(2)  | 81.03(19)   |
| C(38)-Ru(1)-C(1)-C(5) | -162.29(18) |
| C(39)-Ru(1)-C(1)-C(5) | 35.6(3)     |
| B(1)-Ru(1)-C(1)-C(5)  | 116.65(19)  |
| C(2)-Ru(1)-C(1)-C(5)  | -120.1(3)   |
| C(3)-Ru(1)-C(1)-C(5)  | -80.73(19)  |
| C(4)-Ru(1)-C(1)-C(5)  | -39.03(17)  |
| O(1)-C(1)-C(2)-C(3)   | 170.7(3)    |
| C(5)-C(1)-C(2)-C(3)   | -5.1(3)     |
| Ru(1)-C(1)-C(2)-C(3)  | -65.7(2)    |
| O(1)-C(1)-C(2)-C(6)   | -2.2(5)     |
| C(5)-C(1)-C(2)-C(6)   | -178.0(3)   |
| Ru(1)-C(1)-C(2)-C(6)  | 121.5(3)    |
| O(1)-C(1)-C(2)-Ru(1)  | -123.7(3)   |



|                        |             |
|------------------------|-------------|
| C(5)-C(1)-C(2)-Ru(1)   | 60.5(2)     |
| C(38)-Ru(1)-C(2)-C(1)  | 148.61(19)  |
| C(39)-Ru(1)-C(2)-C(1)  | -79.4(5)    |
| B(1)-Ru(1)-C(2)-C(1)   | 61.3(2)     |
| C(5)-Ru(1)-C(2)-C(1)   | -35.75(17)  |
| C(3)-Ru(1)-C(2)-C(1)   | -114.4(2)   |
| C(4)-Ru(1)-C(2)-C(1)   | -77.97(18)  |
| C(38)-Ru(1)-C(2)-C(3)  | -97.03(18)  |
| C(39)-Ru(1)-C(2)-C(3)  | 35.0(5)     |
| B(1)-Ru(1)-C(2)-C(3)   | 175.65(17)  |
| C(5)-Ru(1)-C(2)-C(3)   | 78.61(18)   |
| C(1)-Ru(1)-C(2)-C(3)   | 114.4(2)    |
| C(4)-Ru(1)-C(2)-C(3)   | 36.39(16)   |
| C(38)-Ru(1)-C(2)-C(6)  | 27.8(3)     |
| C(39)-Ru(1)-C(2)-C(6)  | 159.8(4)    |
| B(1)-Ru(1)-C(2)-C(6)   | -59.6(3)    |
| C(5)-Ru(1)-C(2)-C(6)   | -156.6(3)   |
| C(1)-Ru(1)-C(2)-C(6)   | -120.8(3)   |
| C(3)-Ru(1)-C(2)-C(6)   | 124.8(3)    |
| C(4)-Ru(1)-C(2)-C(6)   | 161.2(3)    |
| C(1)-C(2)-C(3)-C(4)    | 3.6(3)      |
| C(6)-C(2)-C(3)-C(4)    | 176.1(3)    |
| Ru(1)-C(2)-C(3)-C(4)   | -62.1(2)    |
| C(1)-C(2)-C(3)-C(12)   | -165.5(3)   |
| C(6)-C(2)-C(3)-C(12)   | 7.0(5)      |
| Ru(1)-C(2)-C(3)-C(12)  | 128.8(3)    |
| C(1)-C(2)-C(3)-Ru(1)   | 65.7(2)     |
| C(6)-C(2)-C(3)-Ru(1)   | -121.8(3)   |
| C(38)-Ru(1)-C(3)-C(4)  | -151.30(18) |
| C(39)-Ru(1)-C(3)-C(4)  | -50.3(2)    |
| B(1)-Ru(1)-C(3)-C(4)   | 110.5(2)    |
| C(2)-Ru(1)-C(3)-C(4)   | 117.8(2)    |
| C(5)-Ru(1)-C(3)-C(4)   | 37.15(16)   |
| C(1)-Ru(1)-C(3)-C(4)   | 79.25(18)   |
| C(38)-Ru(1)-C(3)-C(2)  | 90.94(19)   |
| C(39)-Ru(1)-C(3)-C(2)  | -168.05(18) |
| B(1)-Ru(1)-C(3)-C(2)   | -7.2(3)     |
| C(5)-Ru(1)-C(3)-C(2)   | -80.61(18)  |
| C(1)-Ru(1)-C(3)-C(2)   | -38.51(16)  |
| C(4)-Ru(1)-C(3)-C(2)   | -117.8(2)   |
| C(38)-Ru(1)-C(3)-C(12) | -28.4(3)    |
| C(39)-Ru(1)-C(3)-C(12) | 72.6(3)     |
| B(1)-Ru(1)-C(3)-C(12)  | -126.6(3)   |
| C(2)-Ru(1)-C(3)-C(12)  | -119.3(4)   |
| C(5)-Ru(1)-C(3)-C(12)  | 160.1(3)    |
| C(1)-Ru(1)-C(3)-C(12)  | -157.8(3)   |

|                        |             |
|------------------------|-------------|
| C(4)-Ru(1)-C(3)-C(12)  | 122.9(4)    |
| C(2)-C(3)-C(4)-C(5)    | -0.7(3)     |
| C(12)-C(3)-C(4)-C(5)   | 168.2(3)    |
| Ru(1)-C(3)-C(4)-C(5)   | -61.4(2)    |
| C(2)-C(3)-C(4)-C(19)   | -175.8(3)   |
| C(12)-C(3)-C(4)-C(19)  | -6.9(5)     |
| Ru(1)-C(3)-C(4)-C(19)  | 123.6(3)    |
| C(2)-C(3)-C(4)-Ru(1)   | 60.6(2)     |
| C(12)-C(3)-C(4)-Ru(1)  | -130.5(3)   |
| C(38)-Ru(1)-C(4)-C(3)  | 39.8(2)     |
| C(39)-Ru(1)-C(4)-C(3)  | 141.99(18)  |
| B(1)-Ru(1)-C(4)-C(3)   | -120.7(2)   |
| C(2)-Ru(1)-C(4)-C(3)   | -37.61(16)  |
| C(5)-Ru(1)-C(4)-C(3)   | -118.2(2)   |
| C(1)-Ru(1)-C(4)-C(3)   | -79.62(18)  |
| C(38)-Ru(1)-C(4)-C(5)  | 158.1(2)    |
| C(39)-Ru(1)-C(4)-C(5)  | -99.78(19)  |
| B(1)-Ru(1)-C(4)-C(5)   | -2.5(3)     |
| C(2)-Ru(1)-C(4)-C(5)   | 80.62(18)   |
| C(1)-Ru(1)-C(4)-C(5)   | 38.61(17)   |
| C(3)-Ru(1)-C(4)-C(5)   | 118.2(2)    |
| C(38)-Ru(1)-C(4)-C(19) | -80.0(3)    |
| C(39)-Ru(1)-C(4)-C(19) | 22.1(3)     |
| B(1)-Ru(1)-C(4)-C(19)  | 119.4(3)    |
| C(2)-Ru(1)-C(4)-C(19)  | -157.5(3)   |
| C(5)-Ru(1)-C(4)-C(19)  | 121.9(3)    |
| C(1)-Ru(1)-C(4)-C(19)  | 160.5(3)    |
| C(3)-Ru(1)-C(4)-C(19)  | -119.9(3)   |
| O(1)-C(1)-C(5)-C(4)    | -170.9(3)   |
| C(2)-C(1)-C(5)-C(4)    | 4.7(3)      |
| Ru(1)-C(1)-C(5)-C(4)   | 64.6(2)     |
| O(1)-C(1)-C(5)-C(26)   | 0.8(5)      |
| C(2)-C(1)-C(5)-C(26)   | 176.4(3)    |
| Ru(1)-C(1)-C(5)-C(26)  | -123.6(3)   |
| O(1)-C(1)-C(5)-Ru(1)   | 124.4(3)    |
| C(2)-C(1)-C(5)-Ru(1)   | -60.0(2)    |
| C(3)-C(4)-C(5)-C(1)    | -2.3(3)     |
| C(19)-C(4)-C(5)-C(1)   | 172.5(3)    |
| Ru(1)-C(4)-C(5)-C(1)   | -64.5(2)    |
| C(3)-C(4)-C(5)-C(26)   | -174.1(3)   |
| C(19)-C(4)-C(5)-C(26)  | 0.8(5)      |
| Ru(1)-C(4)-C(5)-C(26)  | 123.7(3)    |
| C(3)-C(4)-C(5)-Ru(1)   | 62.2(2)     |
| C(19)-C(4)-C(5)-Ru(1)  | -122.9(3)   |
| C(38)-Ru(1)-C(5)-C(1)  | 50.0(5)     |
| C(39)-Ru(1)-C(5)-C(1)  | -156.01(19) |

|                         |            |
|-------------------------|------------|
| B(1)-Ru(1)-C(5)-C(1)    | -67.1(2)   |
| C(2)-Ru(1)-C(5)-C(1)    | 35.66(17)  |
| C(3)-Ru(1)-C(5)-C(1)    | 78.24(19)  |
| C(4)-Ru(1)-C(5)-C(1)    | 114.5(3)   |
| C(38)-Ru(1)-C(5)-C(4)   | -64.5(5)   |
| C(39)-Ru(1)-C(5)-C(4)   | 89.53(19)  |
| B(1)-Ru(1)-C(5)-C(4)    | 178.39(18) |
| C(2)-Ru(1)-C(5)-C(4)    | -78.80(18) |
| C(1)-Ru(1)-C(5)-C(4)    | -114.5(3)  |
| C(3)-Ru(1)-C(5)-C(4)    | -36.23(17) |
| C(38)-Ru(1)-C(5)-C(26)  | 172.5(4)   |
| C(39)-Ru(1)-C(5)-C(26)  | -33.5(3)   |
| B(1)-Ru(1)-C(5)-C(26)   | 55.4(3)    |
| C(2)-Ru(1)-C(5)-C(26)   | 158.2(3)   |
| C(1)-Ru(1)-C(5)-C(26)   | 122.6(3)   |
| C(3)-Ru(1)-C(5)-C(26)   | -159.2(3)  |
| C(4)-Ru(1)-C(5)-C(26)   | -123.0(3)  |
| C(1)-C(2)-C(6)-C(11)    | 128.5(3)   |
| C(3)-C(2)-C(6)-C(11)    | -42.8(5)   |
| Ru(1)-C(2)-C(6)-C(11)   | -138.4(3)  |
| C(1)-C(2)-C(6)-C(7)     | -49.6(4)   |
| C(3)-C(2)-C(6)-C(7)     | 139.0(3)   |
| Ru(1)-C(2)-C(6)-C(7)    | 43.5(4)    |
| C(11)-C(6)-C(7)-C(8)    | 0.5(5)     |
| C(2)-C(6)-C(7)-C(8)     | 178.6(3)   |
| C(6)-C(7)-C(8)-C(9)     | 0.2(5)     |
| C(7)-C(8)-C(9)-C(10)    | -0.3(6)    |
| C(8)-C(9)-C(10)-C(11)   | -0.3(6)    |
| C(7)-C(6)-C(11)-C(10)   | -1.0(5)    |
| C(2)-C(6)-C(11)-C(10)   | -179.2(3)  |
| C(9)-C(10)-C(11)-C(6)   | 1.0(5)     |
| C(4)-C(3)-C(12)-C(13)   | 132.0(3)   |
| C(2)-C(3)-C(12)-C(13)   | -60.9(4)   |
| Ru(1)-C(3)-C(12)-C(13)  | 33.1(5)    |
| C(4)-C(3)-C(12)-C(17)   | -54.4(4)   |
| C(2)-C(3)-C(12)-C(17)   | 112.7(3)   |
| Ru(1)-C(3)-C(12)-C(17)  | -153.3(2)  |
| C(17)-C(12)-C(13)-C(14) | -0.8(5)    |
| C(3)-C(12)-C(13)-C(14)  | 172.8(3)   |
| C(12)-C(13)-C(14)-C(15) | -1.1(5)    |
| C(13)-C(14)-C(15)-C(16) | 1.9(5)     |
| C(13)-C(14)-C(15)-C(18) | -179.8(3)  |
| C(14)-C(15)-C(16)-C(17) | -1.0(5)    |
| C(18)-C(15)-C(16)-C(17) | -179.2(3)  |
| C(15)-C(16)-C(17)-C(12) | -0.9(5)    |
| C(13)-C(12)-C(17)-C(16) | 1.7(5)     |

|                         |           |
|-------------------------|-----------|
| C(3)-C(12)-C(17)-C(16)  | -172.2(3) |
| C(3)-C(4)-C(19)-C(24)   | 120.1(3)  |
| C(5)-C(4)-C(19)-C(24)   | -54.0(5)  |
| Ru(1)-C(4)-C(19)-C(24)  | -147.0(3) |
| C(3)-C(4)-C(19)-C(20)   | -56.7(4)  |
| C(5)-C(4)-C(19)-C(20)   | 129.1(3)  |
| Ru(1)-C(4)-C(19)-C(20)  | 36.2(4)   |
| C(24)-C(19)-C(20)-C(21) | 1.4(5)    |
| C(4)-C(19)-C(20)-C(21)  | 178.4(3)  |
| C(19)-C(20)-C(21)-C(22) | 0.8(5)    |
| C(20)-C(21)-C(22)-C(23) | -2.3(5)   |
| C(20)-C(21)-C(22)-C(25) | 176.7(3)  |
| C(21)-C(22)-C(23)-C(24) | 1.7(5)    |
| C(25)-C(22)-C(23)-C(24) | -177.3(3) |
| C(20)-C(19)-C(24)-C(23) | -2.0(5)   |
| C(4)-C(19)-C(24)-C(23)  | -179.0(3) |
| C(22)-C(23)-C(24)-C(19) | 0.5(6)    |
| C(1)-C(5)-C(26)-C(31)   | -34.6(5)  |
| C(4)-C(5)-C(26)-C(31)   | 135.5(3)  |
| Ru(1)-C(5)-C(26)-C(31)  | -129.3(3) |
| C(1)-C(5)-C(26)-C(27)   | 148.1(3)  |
| C(4)-C(5)-C(26)-C(27)   | -41.7(5)  |
| Ru(1)-C(5)-C(26)-C(27)  | 53.5(4)   |
| C(31)-C(26)-C(27)-C(28) | -0.3(5)   |
| C(5)-C(26)-C(27)-C(28)  | 177.0(3)  |
| C(26)-C(27)-C(28)-C(29) | 1.8(5)    |
| C(27)-C(28)-C(29)-C(30) | -2.2(5)   |
| C(28)-C(29)-C(30)-C(31) | 1.0(5)    |
| C(29)-C(30)-C(31)-C(26) | 0.5(5)    |
| C(27)-C(26)-C(31)-C(30) | -0.8(5)   |
| C(5)-C(26)-C(31)-C(30)  | -178.2(3) |
| B(1)-O(2)-C(32)-C(33)   | 178.3(3)  |
| B(1)-O(2)-C(32)-C(37)   | 1.3(3)    |
| C(37)-C(32)-C(33)-C(34) | -0.6(5)   |
| O(2)-C(32)-C(33)-C(34)  | -177.1(3) |
| C(32)-C(33)-C(34)-C(35) | -0.1(5)   |
| C(33)-C(34)-C(35)-C(36) | 0.4(6)    |
| C(34)-C(35)-C(36)-C(37) | 0.0(5)    |
| C(33)-C(32)-C(37)-C(36) | 1.1(5)    |
| O(2)-C(32)-C(37)-C(36)  | 178.2(3)  |
| C(33)-C(32)-C(37)-O(3)  | -178.0(3) |
| O(2)-C(32)-C(37)-O(3)   | -0.9(4)   |
| C(35)-C(36)-C(37)-C(32) | -0.7(5)   |
| C(35)-C(36)-C(37)-O(3)  | 178.2(3)  |
| B(1)-O(3)-C(37)-C(32)   | 0.1(3)    |
| B(1)-O(3)-C(37)-C(36)   | -178.9(3) |

|                        |          |
|------------------------|----------|
| C(39)-Ru(1)-C(38)-O(4) | 156(12)  |
| B(1)-Ru(1)-C(38)-O(4)  | 71(12)   |
| C(2)-Ru(1)-C(38)-O(4)  | -36(12)  |
| C(5)-Ru(1)-C(38)-O(4)  | -49(12)  |
| C(1)-Ru(1)-C(38)-O(4)  | -12(12)  |
| C(3)-Ru(1)-C(38)-O(4)  | -74(12)  |
| C(4)-Ru(1)-C(38)-O(4)  | -97(12)  |
| C(38)-Ru(1)-C(39)-O(5) | 136(25)  |
| B(1)-Ru(1)-C(39)-O(5)  | -140(25) |
| C(2)-Ru(1)-C(39)-O(5)  | 3(25)    |
| C(5)-Ru(1)-C(39)-O(5)  | -36(25)  |
| C(1)-Ru(1)-C(39)-O(5)  | -57(25)  |
| C(3)-Ru(1)-C(39)-O(5)  | 30(25)   |
| C(4)-Ru(1)-C(39)-O(5)  | 2(25)    |

---

Symmetry transformations used to generate equivalent atoms:

Table 7. Hydrogen bonds for **5** [ $\text{\AA}$  and  $^\circ$ ].

| D-H...A          | d(D-H) | d(H...A) | d(D...A) | $\angle(\text{DHA})$ |
|------------------|--------|----------|----------|----------------------|
| O(1)-H(1)...O(2) | 0.84   | 1.96     | 2.680(3) | 143.6                |

---

Symmetry transformations used to generate equivalent atoms:
